# Supplementary material for: “The Service, I Could Not Do without It…”: A Qualitative Study Exploring the Significance of Meals on Wheels among Service Users and People Who Refer Them to the Service
Source: Hindawi journal article supplement (doi:10.1155/2023/6054895), 2023-07-29
Supplement: f1 [file 6054895.f1.docx]

**Table S1:** COREQ (Consolidated criteria for reporting qualitative studies) checklist

| **No** | **Item** | **Guide questions/description** | **Page** |
| --- | --- | --- | --- |
| **Domain 1: Research team and reflexivity** | | | |
| **Personal Characteristics** | | | |
| 1. | Interviewer/facilitator | Which author/s conducted the interview or focus group? | 6 |
| 2. | Credentials | What were the researcher's credentials? *E.g. PhD, MD* | 6 |
| 3. | Occupation | What was their occupation at the time of the study? | 6 |
| 4. | Gender | Was the researcher male or female? | Title page |
| 5. | Experience and training | What experience or training did the researcher have? | 6 |
| **Relationship with participants** | | | |
| 6. | Relationship established | Was a relationship established prior to study commencement? | 6 |
| 7. | Participant knowledge of the interviewer | What did the participants know about the researcher? e*.g. personal goals, reasons for doing the research* | 6 |
| 8. | Interviewer characteristics | What characteristics were reported about the interviewer/facilitator? e.g. *Bias, assumptions, reasons and interests in the research topic* | 6 |
| **Domain 2: study design** | | | |
| **Theoretical framework** | | | |
| 9. | Methodological orientation and Theory | What methodological orientation was stated to underpin the study? *e.g. grounded theory, discourse analysis, ethnography, phenomenology, content analysis* | 7 |
| **Participant selection** | | | |
| 10. | Sampling | How were participants selected? *e.g. purposive, convenience, consecutive, snowball* | 5-6 |
| 11. | Method of approach | How were participants approached? e*.g. face-to-face, telephone, mail, email* | 5-6 |
| 12. | Sample size | How many participants were in the study? | 8 |
| 13. | Non-participation | How many people refused to participate or dropped out? Reasons? | 6 |
| **Setting** | | | |
| 14. | Setting of data collection | Where was the data collected? e*.g. home, clinic, workplace* | 6 |
| 15. | Presence of non-participants | Was anyone else present besides the participants and researchers? | N/A |
| 16. | Description of sample | What are the important characteristics of the sample? *e.g. demographic data, date* | 8, Table 1 |
| **Data collection** | | | |
| 17. | Interview guide | Were questions, prompts, guides provided by the authors? Was it pilot tested? | 6 |
| 18. | Repeat interviews | Were repeat interviews carried out? If yes, how many? | 7 |
| 19. | Audio/visual recording | Did the research use audio or visual recording to collect the data? | 6 |
| 20. | Field notes | Were field notes made during and/or after the interview or focus group? | 6 |
| 21. | Duration | What was the duration of the interviews or focus group? | 6 |
| 22. | Data saturation | Was data saturation discussed? | 6 |
| 23. | Transcripts returned | Were transcripts returned to participants for comment and/or correction? | 6-7 |
| **Domain 3: analysis and findings** | | | |
| **Data analysis** | | | |
| 24. | Number of data coders | How many data coders coded the data? | 7 |
| 25. | Description of the coding tree | Did authors provide a description of the coding tree? | 7 |
| 26. | Derivation of themes | Were themes identified in advance or derived from the data? | 7 |
| 27. | Software | What software, if applicable, was used to manage the data? | 7 |
| 28. | Participant checking | Did participants provide feedback on the findings? | 6-7 |
| **Reporting** | | | |
| 29. | Quotations presented | Were participant quotations presented to illustrate the themes/ findings? Was each quotation identified? e*.g. participant number* | 7, Results section |
| 30. | Data and findings consistent | Was there consistency between the data presented and the findings? | Results section |
| 31. | Clarity of major themes | Were major themes clearly presented in the findings? | Results section |
| 32. | Clarity of minor themes | Is there a description of diverse cases or discussion of minor themes? | Results section |

**Table S2:** Interview guide for Meals on Wheels service users

1. Could you tell me how you became aware that Meals on Wheels are available in your area? [**Prompt for**: did someone refer you to the service and, if so, who; how did you find the information you needed, e.g. website, word of mouth, other means?]

[**Follow-up:** Did the people responsible for the MoWs service assess you to see whether you are eligible to receive meals? Can you please describe the process you went through?]

1. How did you come to the decision to use the MoWs service? [**Prompt for**: what motivated you?]

[**Follow-up 1:** How long have you been using MoWs?]

[**Follow-up 2**: Did you use MoWs before the pandemic started?]

1. What information did you want to find out the first time you enquired about MoWs?

[**Follow-up:** What information was given to you?]

[**Follow-up:** Were there other providers of MoWs available in your area, and if so, how did you decide to choose your current provider?]

1. Please describe the meals you receive.

- How often do you receive meals each week, and how many meals per day?
- Do you receive meals at the weekend?
- What time of the day do the meals arrive?
- Tell me about the types of meals you receive.

[**Follow-up 1:** How do you feel about the variety of the meals?] [**Prompt for:** do menus change and how often?]

[**Follow-up 2:** Do you get side dishes, like vegetables, or puddings? Can you describe them?]

[**Follow-up 3:** Do you get to choose what meals you get?] [**Prompt for:** can you tell me about a time when you had a specific meal requirement? How was this accommodated?]

- What do you think of the taste of the meals you receive?
- What do you think of the healthiness of the meals?
- What do you think of the amount of the meals you receive? [**Prompt for:** portion sizes; meals being filling]
- Do the drivers or the MoWs office give you information on how to handle the meals? What information do they give you? [**Prompt for:** re-heating; what to do with leftovers; any other specific instructions?]
- Can you tell me about a time when you were not able to finish your whole meal?

[**Follow up:** what did you do with the leftovers?]

- Do you pay for the meals? What do you think about the cost of receiving MoWs? [**Prompt for:** compared to buying and preparing food from the supermarket or a restaurant; value-for-money?]
- Have you got any suggestions on how the meals could be improved?

Now think of the time before COVID-19 (I will ask you about COVID-19 later)…

1. In what ways do you feel that receiving MoWs benefit you? [**Prompt for**: what do you value about MoWs?]

[**Follow-up:** In what ways do you feel MoWs improve your everyday life? Can you provide examples?]

1. Can you please describe a typical meal delivery interaction with the driver who delivers your meals? [**Prompt for**: how much time does a driver typically spend with you; does a driver provide any assistance to you in addition to handing you a meal, like opening containers, placing in refrigerator, setting up the meal?]
2. Can you please tell me whether the driver provides you with any other assistance, beyond the meal delivery? [**Prompt for:** welfare checks, remind you to take medication, chores around the house, call someone for you; referral to a partnering organisation or social service?]

[**Follow-up 1:** What has your experience been of receiving this assistance?]

[**Follow-up 2:** In what ways do you feel this assistance improves your everyday life?]

1. Can you tell me whether the driver who delivers your meals talks to you at all about physical activity or exercise, and in which context that would be? [**Prompt for:** walking around the house; time spent sitting; gardening?]

[**Follow-up:** How would you feel if they did talk to you about ways to move more around the house? What type of advice would you value?]

1. Does the driver who delivers your meals ever look for safety concerns in your home? What kind of safety concerns do they normally check for? [**Prompt for:** gas leaks; trip hazards; smoke detectors]

[**Follow-up:** Was there a time when they noticed a safety concern? Can you tell me about that? What did they do when they noticed?]

1. Can you tell me about a time when you had to contact the MoWs office directly?

[**Follow-up:** What was your interaction with the office like?] [**REMIND respondent** not to divulge personal information or information that could potentially identify a driver]

1. Can you tell me about a time when you faced a challenge with the meals delivery, a driver or the MoWs service more generally? [**Prompt for:** delay in getting the meals; problem with the meals themselves; feeling unsafe?]

[**Follow-up:** What was that interaction like? How was this challenge overcome?] [**REMIND respondent** not to divulge personal information or information that could potentially identify a driver]

1. Can you tell me about a time when you were referred to other (additional) services by the MoWs service, due to your specific needs or circumstances? [**Prompt for:** classes run in the community; engagement community events]

[**Follow-up 1:** How was this referral made?]

[**Follow-up 2:** Are there additional supportive services that you would like the MoWs service to provide to you? Can you provide some examples?]

1. Now please think of the ongoing COVID-19 pandemic and the national lockdowns that we had in March 2020 and last winter. In what way might your experience with the MoWs service have changed during that time? Can you provide some examples? [**Prompt for:** change in interactions with the drivers; change in interactions with the MoWs office; change in the food delivered; change in any assistance you get from the drivers?]
2. If there was to be a new lockdown in the future, what do you think the implications would be on your experience as a person receiving meals, and your needs from the service?

[**Follow-up:** Do you have any suggestions on how these challenges could be overcome?]

1. Overall, how do you find your experience with the MoWs service?

[**Follow-up:** What things wouldn’t you change and what things you would you change about the service that is provided to you?]

1. Is there anything else you would like to say about your interactions with the MoWs service or the benefits of the service to you that hasn’t been covered?

**Table S3:** Interview guide for Meals on Wheels referrers

1. Could you tell me how you became aware that Meals on Wheels are available in your area? [**Prompt for:** how did you find the information you needed, e.g. website, word of mouth, other means?]

[**Follow-up:** Did the people responsible for the MoWs service assess the person you referred to see whether they are eligible to receive meals? Can you please describe what this involved?]

1. How did you come to the decision to refer a family member, friend or neighbour to the MoWs service? [**Prompt for**: what motivated you?]

[**Follow-up 1:** How long have they been using MoWs?]

[**Follow-up 2**: Did the person you referred use MoWs before the pandemic started?]

1. What information did you want to find out the first time you enquired about MoWs?

[**Follow-up:** What information was given to you?]

[**Follow-up:** Were there other providers of MoWs available in your area, and if so, how did you decide to choose your current provider?]

1. Please describe your experience with the food MoWs provide to the person you referred to the service.

- How often do they receive meals each week, and how many meals per day?
- Do they receive meals at the weekend?
- What time of the day do the meals arrive?
- Tell me about the types of meals they receive.

[**Follow-up 1:** How do you feel about the variety of the meals?] [**Prompt for:** do menus change and how often?]

[**Follow-up 2:** Do they get side dishes, like vegetables, or puddings? Can you describe them?]

[**Follow-up 3:** Do they get to choose what meals they get?] [**Prompt for:** can you tell me about a time when the person you referred had a specific meal requirement? How was this accommodated?]

- What do you think of the taste of the meals they receive? (e.g. has the person you referred told you about the taste or have you tasted the meals yourself?)
- What do you think of the healthiness of the meals?
- What do you think of the amount of the meals? [**Prompt for:** portion sizes; meals being filling]
- Do the drivers or the MoWs office give you or the person you referred information on how to handle the meals? What information do they give? [**Prompt for:** re-heating; what to do with leftovers; any other specific instructions?]
- Who pays for the meals? What do you think about the cost of receiving MoWs? [**Prompt for:** compared to buying and preparing food from the supermarket or a restaurant; value-for-money?]
- Have you got any suggestions on how the meals could be improved?

Now think of the time before COVID-19 (I will ask you about COVID-19 later)…

1. From your experience, or from what the person you referred tells you, what are the benefits of the service to the people who receive the meals? [**Prompt for**: what do clients value about MoWs?]

[**Follow-up:** In what ways do you feel MoWs improve the everyday life of the person you referred? Can you provide examples?]

1. In what ways do you feel that the person you referred receiving MoWs benefits you personally? [**Prompt for**: what do you value about MoWs?]
2. Based on your experience, can you please describe a typical meal delivery interaction between the person you referred and the driver who delivers their meals? [**Prompt for**: how much time does a driver typically spend with the person you referred; does a driver provide any assistance to them in addition to handing them a meal, like opening containers, placing in refrigerator, setting up the meal?]
3. Can you please tell me whether the driver provides the person you referred with any other assistance, beyond the meal delivery? [**Prompt for:** welfare checks, remind them to take medication, chores around the house, call someone for them; referral to a partnering organisation or social service?]

[**Follow-up 1:** What has your experience been of the person you referred receiving this assistance?]

[**Follow-up 2:** In what ways do you feel this assistance improves the everyday life of the person you referred?]

1. Can you tell me whether the driver who delivers meals to the person you referred talks to them at all about physical activity or exercise, and in which context that would be? [**Prompt for:** walking around the house; time spent sitting; gardening?]

[**Follow-up:** How would you feel if they did talk to the person you referred about ways to move more around the house? What type of advice would you value?]

1. Does the driver who delivers meals to the person you referred ever look for safety concerns in their home? What kind of safety concerns do they normally check for? [**Prompt for:** gas leaks; trip hazards; smoke detectors]

[**Follow-up:** Was there a time when they noticed a safety concern? Can you tell me about that? What did they do when they noticed?]

1. Can you tell me about a time when you personally had to contact the MoWs office directly?

[**Follow-up 1:** What was your interaction with the office like?] [**REMIND respondent** not to divulge personal information or information that could potentially identify a driver]

[**Follow-up 2:** Can you tell me about a time when you were worried about the person you referred and you had to notify the MoWs office?] [**Prompt for:** what was done with this information? What happened next?]

1. Can you tell me about a time when you or the person you referred faced a challenge with the meals delivery, a driver or the MoWs service more generally? [**Prompt for:** delay in getting the meals; problem with the meals themselves; feeling unsafe?]

[**Follow-up:** What was that interaction like? How was this challenge overcome?] [**REMIND respondent** not to divulge personal information or information that could potentially identify a driver]

1. Can you tell me about a time when the person you referred was referred to other (additional) services by the MoWs service, due to their specific needs or circumstances? [**Prompt for:** classes run in the community; engagement community events]

[**Follow-up 1:** How was this referral made?]

[**Follow-up 2:** Are there additional supportive services that you would like the MoWs service to provide to you and the person you referred? Can you provide some examples?]

1. Now please think of the ongoing COVID-19 pandemic and the national lockdowns that we had in March 2020 and last winter. In what way might the experience of the person you referred with the MoWs service have changed during that time? Can you provide some examples? [**Prompt for:** change in interactions between the person you referred and the drivers; change in interactions between the person you referred and the MoWs office; change in the food delivered; change in any assistance the person you referred got from the drivers?]

[**Follow-up:** In what way might your own personal experience with the MoWs service have changed during the pandemic? Can you provide some examples?]

1. If there was to be a new lockdown in the future, what do you think the implications would be on the experience of the person you referred as a person receiving meals, and their needs from the service?

[**Follow-up 1:** Do you have any suggestions on how these challenges could be overcome?]

[**Follow-up 2:** What do you think the implications would be on your own personal experience of the MoWs service? Do you have any suggestions on how these challenges could be overcome?]

1. Overall, how do you find your experience with the MoWs service?

[**Follow-up:** What things wouldn’t you change and what things would you change about the service that is provided to the person you referred?]

1. Is there anything else you would like to say about your interactions with the MoWs service or the benefits of the service to you or the person you referred that hasn’t been covered?

Table S4: Additional quotations from the themes and sub-themes resulting from the thematic analysis

| **Theme** | **Sub-theme and quotations** |
| --- | --- |
| **The importance of a nutritious meal and promoting overall health** | **- Importance of a hot meal that requires no preparation**  *Well, some of it is about I don’t have to cook because it’s already done and edible. As I said, I don’t like microwave stuff, cooking. All in all, I think it’s quite an achievement for me to have them, having those meals (SU8)*  *They’re a fairly good variety at a reasonable price and I don’t have to go out shopping for stuff, because I couldn’t do that anyway and, as I say, I don’t have any washing up or anything to do (SU1)*  *I suppose, getting older, I’m getting lazier because making meals and starting from scratch does not appeal. Plus the fact, as you say, with technology, I’ve got a microwave which is supposed to be an oven as well and I haven’t opened that after five years, so… (SU4)*  *Not too bad, is it? Once it’s hot it brings out the taste of the food (SU8)*  *Yes, so I always have a hot meal at lunch time. I suppose I could have a salad, or I could have a frozen meal if I actually wanted to have it at a different time. It's nice when somebody brings a hot meal to your front door and that means there's always somebody every day, Saturday and Sunday, who I speak to… I mean, you can have a salad instead of a hot meal, but for the most part, I prefer to have a hot meal and if I do have a salad, I'll put down something like salad or something cold for teatime, or a sandwich or that sort of thing at teatime. I do like to have a hot meal in the middle of the day (SU2)*  *Oh, well, they're very good. I mean, there are plenty of different things and I can enjoy them all. There's everything from Lancashire hot pot to the sandwiches that I have, there's always potato and two veg, usually. There's no washing up, which is another benefit… I just swill out the metal containers. I eat straight from the container, because by the time you've tipped it onto a plate, if the plate's not warmed first, it would be not as hot. It's very easy to eat out of the metal containers (SU2)*  *When I wasn’t there, my mum was going to eat something that was warm, and as they say, healthy, nutritious and tasty. So, obviously, that’s important because sometimes, the ready-meals, you’re thinking, “Ah, too much salt, too much....” They’re not always good, and the fact that it would be served in front of her (R12)*  *Yes, so a hot meal. She doesn’t have to cook herself, doesn’t have to use the oven, can’t do any damage to herself, but also someone coming in every day (R8)*  *No, there's nothing needs to be done. That was one of the beauties of it in the initial stages, because in the initial stages, because of the position he was in psychologically, he wouldn't have done it. Eating was too much trouble. Preparing was even more trouble. So at that stage, if he’d had to do any preparation, I'm not sure we’d have gone for it. One of the beauties of it was you take the lid off the tin foil container, get yourself a fork and a knife or a spoon and eat it. And it worked at the time and it's continued to work (R1)*  *If a meal is put in front of him he will eat for England. Yes, it has been very reassuring because, as you say, if the meal is put in front of him he will eat it (R7)*  *And then when she went into hospital and of course something was placed in front of her every lunchtime, she ate it all… And then I just thought she needs something to be put in front of her. So that was the main thing really (R10)*  *Mum’s different, like I say, because she is complicated with her diabetes and isn’t brilliant at sticking to things. But at the same time, I have to say, her appetite does drop an awful lot and she doesn’t fancy eating things. So it’s something there, it gives them an extra something that comes in. It’s like somebody’s offering them something else to eat. Don’t forget to eat today because this might- and on the days that it does appeal it does the trick, they eat that meal. Because it’s the nutrition really (R5)*  *The main benefit is that they’re having, I would consider, decent meals without any effort. So, that’s without the shopping, without the preparation, without the cooking. You know, it’s delivered straight to them. So, that is the big benefit, because my father’s not that mobile either (R14)*  *When they’re delivered they are absolutely piping hot. You can’t even lift them yourself. The drivers bring them up with their gloves on, so they don’t need reheating (R8)*  *Whereas years ago, you and I might think, “I’m going to find something in the kitchen and scribble together something to eat.” But they don’t generally do anything about it and my mum gets hungry to the extent she’ll go and eat all the wrong things and that’s what sends her insulin out. So I think it’s nice to know that it’s cooked, it’s prepared, it’s hot and you can have it to eat. It’s all done, you don’t have to think about it (R5)*  *They have a hot meal served at lunchtime and they have sandwiches for teatime. So, I knew then my worries for them eating sensibly were taken away because I knew they were going to get good meals, if that makes sense, and at least they were getting a decent hot meal a day (R14)*  *So, it’s just the fact that it’s there, it’s hot. And she finds it palatable, she seems to quite enjoy them, and it means that we know she’s getting regular meals that really don’t cause her any trouble or hassle, and she can just eat them (R19)*  *Yes, because I know, on that day, because I’m still working as well, I know he’s still getting a hot meal. So if I was working late or I had to stay on at work, I know he has had a hot meal that day, so I don’t need- You know, that’s a bit of a strain off me (R22)*  *Just knowing that she has a hot meal, well she can’t cook for herself now anyway, it’s just knowing she can have a hot meal. She knows that every day she will have something to eat at dinnertime (R17)*  *Benefits? Well, regular hot food, which she wouldn’t really, otherwise. I mean, she can't cook herself, so that’s a benefit. And also, it’s regular hot food that she doesn’t have to prepare at all, that’s really the key benefit, I think. …And I guess – that’s from my mum’s point of view – but as far as we’re concerned, of course it means that we know she’s getting a meal every day; that in itself is quite comforting, isn’t it? (R19)*  *They’re obviously nutritious because she’s happy. How she was before, the previous carers, it really was a case for medical concern. She was a walking skeleton. They’d turn up and they’d give her a box of microwave chips and a bag of crisps. She lost weight horrifically. Well she’s now a nice, healthy weight, yeah (R13)*  *Also, in [anon’s] case, one of the big things with Alzheimer’s patients is not just the need to eat properly, she does not drink… So it would be a big thing to know for me that someone said, “How much have you had to drink today, [anon]?” But they’re there to deliver meals, they can’t do everything, they’d never get their rounds done (R13)*  **- Meal quality (nutritional balance, taste, variety, portion size and presentation)**  *So to have the Meals on Wheels come in with a hot meal every day and all freshly made with all the veg and everything and it tastes really, really good (SU5)*  *I think it is a cycle, a couple of weeks a cycle, it becomes a bit boring but they do introduce a bit of variety from time to time. I’m quite satisfied because it is quite a good variety really for what you have to pay (SU1)*  *Well, I'm the last person you should ask because all my life, I had school dinners because I was a teacher. So, I mean, I can say it's better than school dinners were, if that's any criteria. I mean, actually, not being able to walk, I don't eat out much but it's quite acceptable and it's one up on school dinners, which I'll say I had for the better part of 30-odd years (SU2)*  *…you have quite a choice. You have a menu which has a three-week rota, so you don’t get the same meal. Unless you want it, you don’t get the same meal every day (SU3)*  *The only thing the doctor told me to be aware of was not to eat anything cheesy, because I've got a heart complaint, I've got an uneven heartbeat. It was just the doctor saying, "Keep off cheese if you can, because it takes a bit of digesting." So, I've put that down, the first thing I told them was, 'Doctor's orders not to eat anything with cheese,' and they've followed that over five years. So, they got the message alright (SU2)*  *Yes, you’ve got quite a choice from it. I haven’t got a menu in front of me, but you have got quite a choice. There’s at least three options… It is enough for me, yes. I mean, I have friends who are male, male friends, who they use the service and they say it’s not enough. They want bigger portions, but I do believe that you can have bigger portions (SU3)*  *And gluten-free. Yes, there’s ingredient information… I mean if you culturally can’t eat a certain food or medically can’t eat a certain food, they will cater for those diets… They definitely provide for all dietary requirements. That’s what they say on their information sheet (SU3)*  *Oh, absolutely beautiful. I mean they might be on the small side, but that’s probably because I’m so used to eating great big massive takeaway meals and I’ve got to get used to sizes. But apart from that, they’re absolutely beautiful… I used to have ready meals, those meals you get from the supermarket and you bung them in the microwave. You could tell the difference between properly homemade and one of those rubbishy microwave meals with loads of salt and everything in it (SU6)*  *Yes, because if I was younger, it wouldn’t be enough, but it is now. I’m not dossing about and using a lot of energy, so it is quite enough for me. It wouldn’t be for some people, I don’t think (SU1)*  *It’s about right for me. I don’t think it would be enough for a man. Well, maybe my menfolk have been different but they’re always had a bigger meal, you know, than I did. But sometimes, if it’s something like rice, you seem to have more quantity than you do with ordinary potatoes and meat. So, I tend to put that to one side and then use it up with gravy and something else at teatime (SU4)*  *Oh, no, I always eat up. As I say, I'm used to school dinners over many, many years. Mind you, I'm not that active, but I do enjoy my food, I'll eat more or less anything reasonable (SU2)*  *Oh, absolutely beautiful. I mean they might be on the small side, but that’s probably because I’m so used to eating great big massive takeaway meals and I’ve got to get used to sizes. But apart from that, they’re absolutely beautiful… I used to have ready meals, those meals you get from the supermarket and you bung them in the microwave. You could tell the difference between properly homemade and one of those rubbishy microwave meals with loads of salt and everything in it (SU5)*  *Yeah, the meals are good, but I still think for the amount of money that they charge they could be a bit bigger to be quite honest with you. Yeah, they’re small portions. To be honest with you, they’re not even big enough for a small child. But at the end of the day, they’re still nice and it’s easier for me because of my mobility needs and everything (SU5)*  *It depends a lot on what it is. They do a very, very good, big salad. If I have a salad on a hot day or if I have salads in summer instead of a hot meal, the salads are very big and quite adequate. In the winter, of course, I could always eat, probably, a little bit more, not a lot (SU2)*  *I would say they were a little on the small side to the point sometimes I’m still hungry afterwards but that’s because I’m a big person… So I’ve got to try and trick my brain into thinking I don’t need so much food. So it’s probably better for me, it’s better for my health… (SU6)*  *The meals are good 4 star quality and very good nutritionally (SU6)*  *I think they’re healthy. You get quite a lot of vegetables. You always get a nice serving of vegetables, so yes. They fulfill her needs I think (R8)*  *Yeah, 4 to 5 stars. I think 5 stars is a bit strong… they’re not going to win any Michelin stars or appear in an Egon Ronay guide. But on the other hand, I don't think they're unacceptable. Well, if they were we’d stop doing it… I would say from my limited knowledge, they're probably reasonably healthy and balanced (R1)*  *She’s very happy with them. Yes, I mean, I haven’t eaten them of course, but certainly the feedback from my mum is that she’s very happy with them… And my gut feeling is that they’re fairly well-balanced meals, from when I’ve spoken to my mother, but I can't give you much more than that, I’m afraid (R19)*  *Yes, overall, not too bad, but I think it’s a bit of a mix of Nan is quite fussy and doesn’t like chewing food. Yes, overall, they’re good quality… I think they’re healthy. You get quite a lot of vegetables. You always get a nice serving of vegetables, so yes. They fulfil her needs I think (R8)*  *I think they try and be balanced. And it’s up to his choice. I think there are healthy options if he wanted, he tends to go for things like cottage pie and things like that. I think they're alright. They're not totally- They're not fried or anything like that. I think for the amount of people who are using the service, they're as good as they can be (R20)*  *Like I said, honestly, there’s nothing we won’t eat, and sometimes I actually see her lick the plate. (Laughter) She’s very happy, you know, and I said to Mum, “we won’t even need to wash it. We can put it back.” (Laughter) (R12)*  *Well the fact that she eats them all says it all really, but she just thinks it’s- So she’ll say something like, “It’s good, wholesome, plain food,” or something, or, “It’s like school meals,” slightly laughing about it, but she does eat it, is the point. Just positive… …I’m just so glad she’s getting a cooked meal every day. It’s got to be healthier than a banana and a Ryvita, hasn’t it? I haven't explored the nutritional content. You know what I mean? I would have thought so (R2)*  *I’ve always asked her obviously in a vain effort to make conversation says what she’s had. And 90% of it is very positive, she’s always liked it. If she didn’t like it she wouldn’t eat it (R21)*  *The puddings are lovely because I have tried those. (Laughter) I can't comment on the main meals because, like I say, with her dementia, it's really hard to get an answer… But they're being eaten, and I would imagine (Laughter) that if they weren't nice, she wouldn't eat it, yes (R4)*  *Never, ever have I heard him complain… it’s not usually that he doesn’t like it or doesn’t like the taste, it might just be that he’s just had enough. So never heard a complaint (R3)*  *So for him I think it’s that I feel as well that he’s getting something that’s nice and balanced. It’s cooked for him, it’s a home-cooked food rather than buying something- some sort of heat and eat meal from the supermarket. I think they’re a really good option above a heat and eat one that you would buy in the supermarket. I certainly think they’re a lot more healthy because they are cooked fresh and they’ve got plenty of vegetables on them… Very rarely does he say, “Oh, I didn’t think much of the meal today.” Like I say, he is quite an easy chap, to be fair to him, he doesn’t complain about a lot really. But he would say- I think he would say (R15)*  *…I have to say that the feedback to me has been very positive. I mean I’ll say to her, “What did you have for your dinner today?” And she’ll say, “Oh, roast beef, and it was absolutely lovely.” I mean she’s been very positive (R16)*  *So, it would be interesting to know a bit more about the food itself, but that’s for me, just to make sure that it is nutritious, but I mean just from my perspective, it’s just knowing what’s in the food, how the food is made, things like that. That would be interesting, you know, because from my perspective, okay, I’m assuming, hopefully rightly, that this food is a lot healthier than me buying a takeaway. Not takeaway, but, you know, a ready-meal (R12)*  *Do you know what, they're quite good. Lots of vegetables, lots of...Yes, I'm quite impressed with those and the fact that they're low sugar as well (R4)*  *… sometimes she hasn’t got that big of an appetite. Some days, yes, they’re probably a little bit too big for her, but overall, a good portion size. She’s not going to go hungry on them (R8)*  *But the portion size is very good. Some people, if they like a lot to eat, it would be too small for them. But certainly for my dad, my mum, when she was alive, they didn’t have huge appetites, it was just there wouldn’t be a lot of wastage. And the other thing is, the meals are always piping hot, they're really hot, so that’s good (R21)*  *Well I think maybe because it’s home-cooked food. I think that’s the winning formula really as opposed to for its competitors from frozen meals (R15)*  *The main benefits are that it’s at least one meal in a day. Knowing what I’ve said just now that- because they don’t move far, they don’t do a lot. If they can get the good calories from one meal, again they’re going to be okay diet wise (R5)*  *One of the benefits is you know that someone's getting a real healthy, nutritious meal, and even if that's the only meal of the day, it's great (R4)*  *I know she’s getting fed whether I’m with her or not. I know she’s enjoying the meals and I know she’s benefiting from them. I know she’s happy (R13)*  *Yes. She’s, “oh, I had sausages and mash today, it was delicious.”… Yeah, she gets very excited by them (R13)*  *When it comes, it’s got the nutritional information on the front and they’re always between 450, 500 calories. There’s always a mixture of vegetables. So, I feel as though it’s good. Sometimes, I’ll taste them and they’re tasty and he’s happy with them (R9)*  *Well, she thinks they’re very nice actually. There’re obviously one or two meals she doesn’t find them very nice but, on the whole, she really enjoys them. Because as I say, when I have been up there with Mum, there’s not much she leaves anyway, she eats it all up… (R17)*  *They smell nice, and I know my mum and dad, well my dad in particular, looks forward to the fish and chips… I think the selection and the healthiness behind it is quite good. There’s always vegetables as well as potatoes, as well as, say, protein, the vitamins and protein element there (R14)*  *Yes, I regularly say to him, “Was that okay?” Sometimes, he’ll say, “It’s not like your mother used to make,” because sometimes his days aren’t so good, but, you know, what I would say is his plate is emptied every day. It’s a rare occasion that he’ll leave things, and he’s never said, “Oh, this isn’t good.” I think once, he said he didn’t enjoy something, but it was something unusual. I don’t know if I’d ordered something with rice and it wasn’t his thing (R9)*  *She is quite fussy with food… because she would like a soup and a dessert, but they only do soup and a main or a main and a dessert. I think if there was that option of having soup as a main and a dessert, I think that would increase her options and variety of food (R8)*  *Obviously their menu is only so extensive and she said, “Well, I don’t like this, don’t like this, don’t like this.” What she does like is quite narrow, so she ends up getting a lot over and over again. It’s trying to widen the variety, but I know obviously they are limited and they can only do so much (R8)*  *And it’s got a good range of choices, in the sense that [area of England has got, I guess, quite a high number of Muslim patients, so they're quite careful to make sure that there is vegetarian food as well as meat and two veg, for people who like meat and two veg. But also, which is quite important from my – I call him the patient – point of view, because of his vascular dementia, his ability to chew and swallow is quite difficult. So there’s always an indication of whether or not you have a swallowing difficulty, then ‘this meal would be good for you’. So something like cottage pie or something, that doesn’t need a lot of chewing (R11)*  *Well, yes, we did. We sat down. As I said to you, we all, my sister and myself, we had them and if something comes that’s new for the first time, I’ll have a little taste and see, and they’re good. They’re tasty meals… they’re not restaurant meals, but they’re nutritionally balanced, their portion-size is perfect (R9)*  *Perhaps sometimes- this is being totally pernickety- they could bring out a new surprise dish and contact me and say, “How about would [anon] like to try this this week?” It’s a little bit perfunctory because the odds are she wouldn’t try anything new anyway. I mean I’m pretty happy. She’s happy and she’s getting nutritious meals, that’s the main thing (R13)*  *It’s usually a kind of a meat-and-two-veg type of meal, or that’s what he chooses because there’s always a choice of two or three different meals each day. He's old fashioned. He likes his meat and two veg. He doesn't tend to go for curries or pastas or relatively modern meals, or spicy meals. So he typically likes things like shepherd's pie and he likes his Sunday roast. They always do a Sunday roast and he enjoys that… he tends to go for fish on a Friday. You know, and it's because of his own personal traditions (R1)*  *I think they’ve got- it is not fancy food. I think it is food that is very suited to its target generation (R7)*  *When we first started, I was really happy with it, there was a good variety of meat and vegetarian meals. But we’re three years in now and they haven't really changed. The only plus side of Alzheimer’s is that my mum can’t remember what she ate the day before anyway, so it doesn’t become that repetitive to her (R10)*  *So, the choice is really good, but they are obviously very, kind of, English-centred. So, you get a lot of cottage pie, shepherd’s pie, things like that, and whilst they’re lovely, I think, “Well, mum would probably have something more like chilli, curry,” you know, kind of, reflective maybe of the cultures that we have around the UK (R12)*  *Because my parents are elderly and very set in their ways, for example, you wouldn’t have my dad eating a curry because he’s never had a curry. So, I mean he is very set in his ways. He has lived abroad. He lived in Italy for two years, but he doesn’t really eat pasta, you know what I mean? (Laughter).. I don’t think there’s anything really I can think of that strikes me that I’d want to change. As I say, a little bit more variety for easy to chew foods, but I believe they can offer a menu with smoothies and things like that (R14)*  *It’s conventional British cooking. She’s chosen the fish and chips, meat pie, that sort of thing, roast (R2)*  *He has his favourites. So, whilst there is a choice every day, the choice isn't unlimited and that's for obvious reasons. So he tends to gravitate towards certain meals that he knows he likes. I think he would love to have a broader choice, but I don't think that's practically feasible or probably viable from their point of view (R1)*  *She seems quite happy with it. She seems quite happy with the variety and the various things that are available… I mean, she’s an 89-year-old lady, if I’m honest, she doesn’t want an awful lot of variety. (Laughter)… Variety is not really what she’s looking for, if you see what I mean? She wants some variety, but I suspect if it was me, I would want more (R18)*  *There’s a lot on the menu. Obviously we just have what dad- Well, what we think he’ll eat now. But there’s a lot of choice (R19)*  *But the meals seem to be pretty varied, and they seem to be pretty good. Bearing in mind her diet now anything she cooks is quite limited, she seems to eat them fully. I often go round there and tidy up or put stuff in the dishwasher, stuff like that and she does seem to eat it all. So I think it’s a pretty good variety and she likes the puddings as well (R20)*  *I think the variety is very good. He has a menu, a spring and autumn menu, on a six-weekly rolling basis. So he can pick what he wants (R21)*  *… but lots of options and variety. So there is always fish, meat, and vegetarian, something else. Yeah, so there is always something she likes… I think they've got a really good choice. Yes, my mother can be quite fussy. (Laughter) She's of that generation that if isn't potato and veg and something she recognises, she won't eat it. And I don't think we've had in the last three months her saying- They've always been eaten, so that's a good sign (R4)*  *Well, I’ve got the menu, actually, Meals on Wheels, they sent me the menu today because I wanted to check something and on the menu there’s really good choice of stuff, a very good choice in meals. Looking through I thought, “Oh yes, I would have that.” But no, they have a very good choice of meals as well (R17)*  *And it’s got a good range of choices, so they're quite careful to make sure that there is vegetarian food as well as meat and two veg, for people who like meat and two veg… there’s always an indication of whether or not you have a swallowing difficulty, then ‘this meal would be good for you (R11)*  *Erm, well they’ve got a very extensive menu, a lot of variety. But again, one of the constraints are dealing with Alzheimer’s, they don’t like trying new things, they like familiar. So what I’ve settled on doing with [anon] is we alternate a weekly menu. So we have week A set meals, week B set meals. It’s a good variety of nutrients and she enjoys them (R13)*  *This is all subject to commercial viability and practicality. I think it would be nice if there was a greater choice. But that might not be viable or practical.* *I think it would be nice if they rotated what was on the menu each week a little more. The meals do tend to repeat themselves perhaps slightly more frequently than you might want. On the other hand… I think elderly people are rather more habitual than younger people, so it's probably quite nice to know he's going to get cottage pie on a Tuesday and a Sunday roast on a Sunday. So maybe slightly more space between rotation, and maybe slightly more choice. But please don't think that's a grumble. I'm thinking of an ideal world (R1)*  *So, I suppose if I had to offer a suggestion, I’d say more variety, but, you know, you can’t have everything. I understand they’ve got to run their business (R9)*  *No, I would just like to see the menus rotate a little bit. But you see, that’s me, mum seems quite happy (R10)*  *But perhaps it would be better for her for a bit more variety. While it’s easy for me to sit back and carry on with the rest of my life which still revolves around [anon], sometimes a bit more input from Wheels on Meals to say, “Hey, how about varying it a bit more? Have you thought about this or that?” (R13)*  *They have recently introduced fruit juice because, obviously, elderly perhaps don’t eat a lot of fruit. I think perhaps more choice. At the moment, you’ve got orange. They’re very tiny cartons, and you’ve got orange and they’ve recently introduced apple juice. So, that might be a way forward, or perhaps offer fruit instead of a pudding, especially in the evening because you’ve got the choice between a small slice of cake and a yoghurt, or maybe a banana perhaps… chewing is a bit of an issue. So, maybe to bear that in mind. So, having vegetarian meals that are easy to chew and also the normal menu meals, because my mum isn’t a vegetarian, for example, although sometimes, I do the macaroni cheese because that’s the only easy to chew option on there (R14)*  *…maybe just a bit more variety, and desserts actually, the desserts as well, they’re quite, sort of- I mean, again, we’ll eat anything, but it’s very, sort of, apple pie and custard. So, I don’t know, but I mean I don’t know if they could cater, but if they had a bit more variety, that would be good, yes (R12)*  *I think it could be better, as in the specials are the same specials every week. My dad knows what’s coming. He’ll say, “Sunday’s lamb, Monday’s this.” He knows exactly what’s coming every day because he always has the specials each day. For him, I don’t know if that’s a good thing, but for me, if it was me having them, I’d like to see a bit more variety. I don’t want to eat the same thing every day. I know it’s over seven days, but on a Monday, it’s the same thing every Monday, on the Tuesday, it’s the same. So, for me, I think I’d like to see a bit more variety in them. Yes, I think that would be the main thing (R6)*  *…being able to have soup as a main meal option, that would be a big thing for my Nan. She would like soup and dessert. Other than that, yes, my Nan is quite fussy. Obviously their menu is only so extensive and she said, “Well, I don’t like this, don’t like this, don’t like this.” What she does like is quite narrow, so she ends up getting a lot over and over again. It’s trying to widen the variety, but I know obviously they are limited and they can only do so much (R8)*  *I rang them initially and I believe I was sent a selection of menus, because my mum also has issues with swallowing and things like that. So, on the menus, they’ve got easy to chew foods and things like that. So, I just thought that was really good… and also, I noticed on the menus, there’s a code that if someone’s been in hospital and they need feeding up, you know, high-calorie food, there’s an option for that as well (R14)*  *Well, I choose them for him and order every month or every six weeks, depending on things. There is a big choice and we found the things that he really likes, and he seems very, very happy with them… My brother is a creature of habit. He has, over the course of a month, plenty of variety. I do repeat some of the meals because he really likes them, and sometimes I slip in something that he hasn’t had before. But yes, I am very happy with what is available to him. There is a good balance… He seems very happy with them. It is not always easy to get information out of my brother because he tends to tell me what he thinks I want to know… I think he is genuinely very satisfied with the variety. He says they are very tasty and he really does like the ham and leek crumble, so that is the best I can go on. They look a good balance, can have salad if you want. They look a good, balanced meal to me (R7)*  *Well as far as I know I think it’s a three-week rolling menu. When I was looking at the choices… I would say that it’s a pretty good selection really (R15)*  *Yes, I’m really pleased with them. There’s always an option of two meals and there’s two fish courses a week. You know, if I could choose in an ideal world, we wouldn’t be having this, but given that this is what we need, I’m pleased with what’s on offer (R9)*  *Yeah, the meals are good, but I still think for the amount of money that they charge they could be a bit bigger to be quite honest with you. Yeah, they’re small portions. To be honest with you, they’re not even big enough for a small child. But at the end of the day, they’re still nice... (SU6)*  *They’re okay, as long as you open them up and eat them then, and as long as I remember to warm the plate (SU4)*  *I think, sometimes, they’re a bit dry. I'm thinking mainly of the corned beef hash which, sometimes, needs extra gravy afterwards. Whereas, you know, it shouldn’t. It should be okay. Now, whether that’s the cooking or the heating it up or what, I don’t know (SU4)*  *The other thing I know, they've got some new vans recently and the thing about the custard is that obviously it has to be put in there frozen and then at the end of it travelling around, if I get a late delivery - which sometimes happens - the custard has become quite thick and almost like… You know, it's hot, but it's thickened it, with it being in the heat for probably four or five hours, it's got a bit thick. It's not inedible or anything (SU2)*  *I think what struck me at first – and I wasn’t really prepared for it – was the fact that it was the look of things, the first time. It was shepherd’s pie which gravy had oozed out of and I thought, “Ugh!” you know. (Laughter) But, I mean, the quality of the meal was fine, when I started eating it. It was fine. So, you’ve just got to adjust to the fact that it’s not going to look like it would have done if you’d done it yourself (SU4)*  *They’re not massive portions, but elderly people that aren’t moving a lot don’t need a lot of calories, do they? (R5)*  *I think it is adequate for him. It may be that he is putting on weight because he is actually what is put in front of him. But I'm happy that he is getting good nourishment that is adequate for his needs. He doesn’t do very much. He sits around a lot. He doesn’t go far. He sits down most of the time, so he hasn’t got a huge energy requirement anyway (R7)*  *For my dad, it works. The puddings could be a bit bigger, to be honest. They’re very small. The compartment that they come in is less than half the size of the dinner. I might have a little bit of a bigger mouth, but they’re probably about four good spoonfuls for me. So, they could be a little bit bigger for the desserts, but I think the main meals are quite adequate (R6)*  *That’s fine. If you put it in front of my husband, he’d laugh, but for a 93-year-old, it’s fine. It doesn’t over-face her and she feels like, if she’s eaten it all, she has done well (R10)*  *I’ve seen a big change in her, yes. But they look appetising, they put them out on a plate. The desserts are very nice, proper desserts with custard and so on. Sandwiches are nicely presented. There’s a fruit juice and a cake to go with it and she’s very, very happy with it… for me I would say they’re small. For her, they’re ideal. They’re perfect, yes (R13)*  *I think they’re good. I mean, I think they are the normal size, as compared to what I normally would provide, which would be probably twice as much, and that’s not. So, I think they’re good. Yes, I think they’re good overall, apart from, as I said, some of the puddings seem to be a little bit too big, but yes (R12)*  *I know some people say about the portion sizes because I’ve heard through the grapevine people say, “Oh, you don’t get very much.” But actually, I think probably for someone of that age, it is a good meal. I think probably it is well balanced and probably what you should be eating (R15)*  *Yes, they’re not restaurant meals, but they’re nutritionally balanced, their portion-size is perfect… Oh, what I would say, they’ve got the portion size right. Sometimes, when I look at it, I think, “That is enough,” but actually, you sit down and eat it, you think, “Yes, there’s plenty,” and for Dad it’s plenty (R9)*  *I would say it’s about right. She doesn’t eat a lot nowadays but the containers from what I can see, the main meal is in like a Chinese takeaway foil. And that is alright for her to be honest, and then the pudding is generally either in a container about half that size (R21)*  *It wouldn't be enough for me, but he is 90. He seems to be happy with the amount he gets. I've not heard him grumble that they leave him hungry. To be fair, he has put weight on since he was ill, and, in fact, he was telling me the other day that he's afraid he's getting too fat. (Laughter) (R1)*  *Ideal for her, absolutely ideal for her. I think for me or the rest of my family, we would definitely need something to go with it. (Laughter) But it's aimed at the elderly, and I think it is probably the perfect portion size for her (R4)*  *I think it’s worked really well. As I say, occasionally he might leave a little bit of the savoury meal, but that might just be a bit of potato or something. But that’s only a case of leaving, mostly he eats the whole lot and the pudding. Sometimes he eats the pudding later. He will eat the lunch at lunchtime and then he’ll have the pudding in the afternoon (R3)*  *… it would be nice to have more vegetables. I think sometimes if it’s a meat dish then perhaps it have a few more bits of meat in it but otherwise… Fish as well, if have fish it would be quite nice to have a slightly bigger portion but that’s just me. I think Mum’s quite happy with the size though (R17)*  *Perhaps slightly bigger portions, but they do the portions to the population that they are serving, don’t they? (R7)*  *The puddings are very nice, but the actual main meals, I just find them a little under-seasoned. But my dad has never complained and he always enjoys them. Well, he enjoys the majority (R6)*  *They’re not too bad. I mean, there’s always a vegetable with them. It’s very rare that I’ve not seen a meal without vegetables being there, and they do have a mixture of vegetables. So, sometimes it’s swede and carrot, sometimes it’s green beans and carrots. You know, they do mix it up like that. I don’t think they’re going to be 100% nutritional and fresh. You know, we’re not blind to that, but they do, I think, what they can with what they get (R6)*  *Yes. Well I do. Personally, I think the vegetables are a bit overcooked, but what can you do? I’ve no experience of catering for high volumes. And I sometimes wonder if there are enough fresh vegetables provided (R11)*  *They don’t look very appealing sometimes, I have to be honest. But what meals do when you put them in a little aluminium tray? They do look a bit like school dinners. I wouldn’t know what to suggest to make it maybe look nicer (R5)*  *Well, what can I say? It’s a bit like school dinners. I mean, that’s what it looks like, when I’ve seen it arrive. I’m sure it’s nutritionally-balanced. And because the client has got such a high level of dementia, he just eats what’s put in front of him… He’s fortunate in that he still does seem to enjoy his food. And it’s not too much. If it’s something that he can eat easily, then he does seem to finish it all (R11)*  *I can’t remember what it was. I think it might have been the vegetarian cottage pie or something like that, and I thought it was nice… It was obvious they’d been careful, you can taste they’ve been very careful with the salt content. So, maybe that salt and pepper. Personally, maybe I would have added a little bit more, you know, bring out the flavour, but, obviously, they try to be good with that kind of stuff. So, I thought it was good. I think keeping it at maybe, kind of, like a neutral level so, (a), it’s healthy and, (b), it pleases as many people as possible (P12)*  *Well, they're piping hot. That’s not a criticism, I’m trying to look for a criticism. No, not really (R2)*  *… my mum seems quite happy with it. What I would say is, I know it has been sat, heated, but it’s sometimes a little bit gelatinous. You know, the gravy has congealed a little bit. But that can’t be helped, can it, really? It’s a heated meal, that’s been sat in a heat box, so… (R10)*  *I think because they’re mass produced you can’t get away from that mass production look with the mixed veg in every one and the little thing of potato or whatever. You can’t get away from that. You can’t make it look like it’s been individually made. Maybe presentation would make it more appealing sometimes when they take the lid off because sometimes it look a bit- you know when you look at it and think, “Oh no.” You wouldn’t necessarily want to eat it. But other than that. Like I say, I don’t eat them every day and they’re probably absolutely fine (R5)*  *The slight niggle I’ve got is there’s no fresh fruit or anything like that. That might be a cost issue and also wastage, because fruit does go off very quickly. And I do try and supplement that, to make sure he’s got fresh fruit. But I do sometimes wonder about the nutritional value of the vegetables, I think they are kind of boiled to extinction. But that might be because I like my vegetables crunchy, I don't know. It’s very difficult to be objective and, as I say, I’m just very grateful that they're there (R11)*  *The only thing I would say, and I don’t think they could overcome this, is they hand mum a red-hot tinfoil dish, and I don’t think she’s always prepared for it. So she doesn’t- she can’t carry it, it’s really, really hot. So I don’t know whether there’s something they can put around the edge where the foil is folded over the cardboard so that they can carry it safely (R5)*  *It’s not a criticism, the only thing I would suggest unfortunately it’s the waste thing. The issue that there is for her is because they’re in a tin foil container, she can’t pop them in the microwave. She has to empty them out and that’s more a problem for her I think (R21)*  *The quality slipped a little bit maybe, I don't know, six months ago, and [anon] was dithering a bit about whether he wanted to continue having them. And I spoke to [anon], the manager, and told him that, and he said the difference was they used to have their own in-house chef. He moved on and they now have the meals provided from a third-party. And that was kind of settling down a bit. And over the last couple of months, [anon] hasn't grumbled once. So I think the quality has come back up again (R1)*  *He usually eats it all. I have to say, I don't think the quality of the meals is as good as it was in the beginning. I think they’ve changed the supplier. Initially, the meals were really pretty good for the service provided. …there’s a cost implication to everything…I think they probably changed supplier because they could get a cheaper option. Years ago, meals used to be cooked at a local- We’ve got a factory here, the canteen used to cook the meals and it was delivered locally by volunteers. And that used to be fantastic, I understand. My parents didn’t use that service at the time. I’m not sure what they can do, unless people were prepared to pay more for their meals (R21)*  **- Appropriateness of discussing and promoting physical activity**  *I think (if they talked to me about physical activity) I’d be wondering whether my dinner was getting cold or not (SU4)*  *Well, not really, no, because at the end of the day I would basically find that a bit insulting. If you’re a larger person like myself, and they’re giving you smaller portions or telling you to move more. That’s like saying, “Oh, you really need thIs because you’re overweight.” I would find that a bit insulting, a bit embarrassing to be honest with you (SU6)*  *I don't know. I've never heard [anon] talk about that. It certainly wasn't something that was spelt out when they told me what the service was all about. Whereas the welfare thing was spelt out, so I don't know. [Anon], despite the fact he's 90, when he's well, he is quite physically active. He likes to go for a walk. He likes to go to the pub for a pint. So for a man of 90 he's pretty active. When he's not well, then he gets a bit slovenly and a bit can’t be bothered. But I'm not aware they’ve had conversations about exercise and activity (R1)*  *…I get the impression they’ve got a lot of houses to go to… Which I get, 100%. But to be honest, mum just wants to sit down and eat the meal, she probably doesn’t want to just talk to some random... Because she’s not that chatty and she just- It’s all very pleasant though, I’m not- You know. She jokes with them, and they're gone. But no, they don’t sit and give her a health lecture or anything… Which she would hate anyway, so it’s good. (Laughter) (R2)*  *I guess the problem is, is if he says an answer to something that then would require medical assistance, where do they go with that? If he wasn’t so far advanced in his dementia, so say it was nine years ago. I would have thought it was more appropriate then because he was more lucid, and it was more relevant. But now because he has the carers morning and night, first thing and last thing, it’s like he has those touch points during the day and it’s not quite so relevant. But I would say if you’d have wound back by five years or so and for the first four years, that probably would have been more relevant (R3)*  *Not really, no. She's not mobile. She doesn't leave one room. If someone else was trying to encourage it, it wouldn't be a bad thing, but I just don't think it would last. (Laughter) (R4)*  *I think maybe, yes, if anything, probably the benefits of just standing up occasionally, rather than sitting in one place, because you get pressure sores and things like that. We've got pressure bed mattresses and stuff like that, pressure cushions and...But yeah, sometimes maybe just reminding to, “Might not be a bad thing to stand up occasionally.” (R4)*  *No, I don’t think so. I wouldn’t have said so because the interaction especially with mum is very quick, very brief, at the door… I think if they felt they knew the same person delivering every day and they’ve got a bit more of a rapport with them, they probably would feel comfortable about being- that being part of a discussion. But I don’t know how easy it would be for a driver to strike up that type of conversation, to be honest with you. I can’t imagine that that’s something they were thinking they might do (R5)*  *Oh, he would say, “Yes, yes, I’ll do that. I’ll have a walk round the garden,” and then he wouldn’t do it. [Anon], he is inclined to fall. His leg gives way. He has just never been very active. I say to him, “Use it or lose it. Walk round the grounds. Have a little walk round. Take your stick.” “Yes, yes, yes, yes, I’ll do that. I’ll do that.” I know darn well he won’t… It would be wasting their time, to be honest (R7)*  *No, and to be honest, I wouldn’t want that from them. I mean, everybody’s relationship is different. I don’t expect that from them. We talk about the weather and everything. We never talk about Dad (R9)*  *I wouldn’t mind them asking that. But if they did ask that, my mum wouldn’t be able to tell them because she wouldn’t be able to remember (R10)*  *I don't think that’s their job. I just don’t, I don’t think they’ve got the training to do that, I don't think it’s their job. So I don't think it would be appropriate. Unless there was additional training. So no (R11)*  *Well in an ideal world... it would be a massive plus if they had the time to do just what you said (encourage PA) (R13)*  *It’s a difficult one because I think where my parents are concerned, they just associate the driver, the person with their food, their meals. Well, particularly my mum, it wouldn’t make any difference. They couldn’t have a conversation with her, and my father, he might take a bit of notice because it’s not a family member asking him if he’s had any exercise today, and he does tend to spend most of his day sat in a chair. So, yes, he might take more notice perhaps of a stranger saying that to him (R14)*  *Yes, I think it would be good… So, I think that would be really good, you know, just reminding her to maybe get up a little bit. She’s lucky enough that she’s got quite a big garden… So, I just think a reminder to go out in the garden. So, yes, I think it would be really good, yes (R12)*  *Erm, yeah, I think it’s a good idea. I think you can get some sort of health promotion in anything these days. (Laughter) It’s a good idea. I think you, I guess, squeeze it in wherever you can. So yes, I would think so. Thinking about her, for someone like her I think it would be very motivating for her, I think, for someone to have a little chat with her… I know my mother-in-law someone comes in and has a little chat with her, it really boosts her and she takes it on board and thinks, “Oh, that would be a good idea, maybe I should give that a go.” So I think, yeah, I don’t think it could do any harm (R15)*  *Well, yes. I don’t know how he would get on with that, but, yes, anything that would help her really has got to be positive hasn’t it really (R16)*  *I don’t- yeah, it might be but Mum, yeah, we tell her to do exercises ourselves to her so… If they did say something though, they might suggest it to her and she might listen to them as well to do exercise, yes (R17)*  *Would it be appropriate? Well, hmm, well maybe. She has the physio come round. I think the answer to that is she has all sorts of people telling her (Laughter) that stuff already, so would it be appropriate? I’m not sure to the extent that she would want that, if I’m honest… So, probably would it be appropriate? Probably not if you just want a straight answer to that question… Having said that of course, if she wasn’t seeing the physio, because the physio comes round and the nurses come round, so if those two didn’t come round, then it would be appropriate, would it not? But I mean, in the current regime, I don’t think it would be appropriate, no (R19)*  *My dad literally will sit in his chair all day. The carers have to get him to get up. But obviously, if they're delivering a meal, then I don’t want him to be getting up at that point… So no, I don’t think that would probably be appropriate, or necessary, at that time. I think, if they were to stay longer, it would be more to encourage him to eat, and to talk to him (R20)*  *… when we discussed this with her she did make the point that it’s so painful that exercise was ridiculous. And she has a point but at the same time, if she doesn’t move she will lose the ability to move. And that is what we’re fighting at the moment is the fact she can just about get out of her chair to go to the kitchen and back and to the loo. And she goes to the bedroom unaided but it takes her, and I joke not, about five minutes to walk from the kitchen to the living room and that’s the room next door. It would be good if we could get her to do any kind of exercise that builds strength but it’s incredibly difficult (R21)*  *Yes, definitely. Because people decondition so much. And I think the pandemic has been terrible for this. And it depends what services are available, but I think just having a little- You know, just a chat with someone. Because they may be able to signpost them to other services (R21)* |
| **Safeguarding and welfare** | **- Carrying out welfare checks**  *The meals on wheels service includes a welfare check. They come every day, except Christmas Day, and they bring lovely, hot ready-made meals and you have quite a choice. They have a very good staff- a driver, and they’ve never failed me so far (SU3)*  *If I see them coming and I open the door, they always say, "Thank you," and, "How are you? How are you feeling today?" They always ask the welfare-type question. If I've got any message about anything, I can always tell them. They're all quite friendly (SU2)*  *You know, just checking in on customers that use the service, to make sure that everything’s okay and there are no safety concerns or concerns for people’s welfare (SU4)*  *I was ill once and the lady who brought the meal, she was really wonderful. She phoned the administrative office in my flat, and they saw that I got an ambulance and so on. So, she was on the ball straightaway (SU3)*  *You know, they're very helpful in those ways, they're used to talking to, obviously, elderly people like me, but they always ask after my welfare. The first thing they say is, "How are you feeling today? Alright?" and I'd say, "Yes, I'm a bit cold since the weather has gone from being a warmish week and then we've had some cold winds." I often say to them, "Is it me or do I need to put an extra cardigan on?" They'll say, "Oh, put your extra cardigan on, there's a cold wind blowing today." (SU2)*  *(the thing that clinched was) the person delivering the meal would become a sort of a friend… and get themselves to a position where they knew what he was like and therefore, hopefully would notice any changes. And if they noticed any changes in his manner, in his appearance, or his health, from a visual point of view, they would ring me. So they have my number. And if they feel anything is wrong, they ring me up. And they've done it a few times, saying, “He didn’t seem quite himself today, we'll just keep an eye on him.” Or, one occasion, “Look, he's not very well. I think we should send for assistance.” (R1)*  *The welfare aspect, someone coming in and giving them the once over. I can't put it any better than that. They don't claim to be nurses or doctors or health visitors. They're just sensible, mature people who will spot something obvious and do something about it (R1)*  *He was ill not very long ago one day. And she happened to turn up when he was ill, and she notified the house manager in the apartments that he wasn't well. And they rang for an ambulance and she sat with him for several hours until the ambulance came (R1)*  *I like that they check on a very basic level that he answers the door and that he’s alive at lunchtimes. And over the years there have been very few occasions where one of them has phoned me to say we’re not getting any reply from the door, is there a problem? And that’s a good check-in during the day in case something has happened. So yeah, I know that during the middle of the day if something was wrong that one of them would spot that when they go in. Not that I’d leave the responsibility for them to clear it up but more the sense of an alert, flagging or something (R3)*  *I value that it is giving him the hot meals. I know that they do turn up. I know that if there’s any problems, they always contact me, either by email or by telephone… I know they would because they’re that kind of [provider]. Obviously, all [providers] are there for the profit, but they actually care (R6)*  *… they don’t make it obvious, but I know that they just look around very quickly just to check there’s nothing silly lying around or say he’d dropped some glass or just something. I just notice that they do look around, but they do it in a way that’s quite discreet (R3)*  *… but they do an informal check around the house to make sure everything's fine. Oh, yes. Yes, that is one of the things that they come in, and when they do that welfare check, they'll check around, they'll check the front door is locked so she can't get out of (Laughter) the front door, and they check the cooker and… Yes they do that as normal, as routine really (R4)*  *They do a little welfare check when they're here as well. So they have my phone number, so obviously, if there was a problem, they'd give me a call. So if she wasn't in or anything was up, they would give me a call (R4)*  *And also I know that, at that part of the day, somebody has seen her. And I know that, if she didn’t answer the door, somebody would phone me (R10)*  *And I also know that’s another check, that if they were worried about him, they would ring me (R22)*  *…And I was so pleased that it was not only meals but a health and wellbeing check as well… and I know… that they would ring me if she was on the floor or didn’t answer the door or something like that (R2)*  *…They unpack the meal and put it in his kitchen. They have a chat with him. Unknown to him, weigh him up (R1)*  *But certainly, I've got peace of mind that if they suspected something was wrong they would be in touch with me. On that episode when he wasn’t there and they were, well, they couldn’t get into the flat and they were concerned about him (R7)*  *You know, the fact that they are so nice and they do their little things and one day, the lady that came had said that she’d gone to another customer and they were poorly, and she’d had to stay for several hours. That was such a lovely thing to hear, to think that, gosh, if they ever came and I wasn’t here and something had happened to Dad, that they would do something, even though that’s way beyond their remit. It makes you feel as though they do care (R9)*  *I know at 12 o’clock that somebody has been to the house and she’s alright… If he couldn’t deliver that meal because she had fallen or she was in… he would be reporting it back to his office and they would be ringing me (R16)*  *I personally, it’s just nice knowing that Mum has a main meal, which is a hot meal, each day and also the people who deliver keep a check on Mum as well to make sure. Because at one time they couldn’t make Mum hear so they got in contact with my daughter, at the time, and to say they couldn’t get her to open the door. And so, it’s a care factor as well really just to know. Mum has a carer as well, but it’s just knowing someone else is there at dinnertime just to keep an eye on her really. And every day they ask how she is, which is nice (R17)*  *So it’s nice, and I know that if they thought there was an issue I would be contacted (R21)*  *Well, I mean, the obvious things, if there was a rug rolled up,, they'd probably straighten it. You know, if there was a saucepan on the stove boiling over. But I think no more than you or I might if we walked in (R1)*  *I think they do, but I think it’s done in a really subtle way… they don’t make it obvious, but I know that they just look around very quickly just to check there’s nothing silly lying around or say he’d dropped some glass or just something. I just notice that they do look around, but they do it in a way that’s quite discreet (R3)*  **- Meals on Wheels are an essential part of the care package**  *I can’t do it, because I’m housebound. I mean it’s fundamental, partly, isn’t it (SU3)*  *I'm feeling that they're a very important part of my daily life and I would hate if they stopped or if anything happened to change the supplier (SU2)*  *… it benefits me because basically if I didn’t have them I would literally starve all day because I couldn’t get up … (SU6)*  *I'm feeling that they're a very important part of my daily life and I would hate if they stopped or if anything happened to change the supplier. I couldn’t do without it, it's excellent. I wouldn't say 'excellent' if I didn't mean it, but if it stopped, what would I do? You see, I can hobble around with my walking stick or a walker in the house, but if it comes to doing things like standing over a cooker or peeling potatoes or cooking meat and so forth, I don't think I'd manage, I'd probably just make a sandwich and live on bread sandwiches (SU2)*  *They are brilliant. I mean, the service, I could not do without it. I still can’t be without it. So, it is really a lifeline (SU3)*  *Like I said, the main benefit for me is that someone comes in every single day, because we can’t get round her every day. It’s that added bonus of why I would use Meals on Wheels over another ready meal supplier (R8)*  *To me, it’s a lifeline really, because otherwise I would have no life, because I would be there all the time (R10)*  *So, he’s completely immobile, and without a hot meal actually being there, because the carers that I have placed in, they still weren’t allocated enough time to do a hot meal such as a pie with vegetables, for instance. You know, they were able to chuck some chips in and able to rush them down him, but I wouldn’t be happy with that, and so I wouldn’t expect any family member to be happy with that (R6)*  *Now, I see them as a key part of helping me to care for Dad because it gives me a freedom to know that at lunchtime, if I wasn’t here, he would be okay. You know, if I had to go away, it’s the peace of mind for him, it’s keeping him healthy, he’s doing fine, and the fact they come, they’re pleasant, it’s human contact, and for me as a carer, I like them. I like the people that come. It makes me feel that I’m not so much on my own with it, which I hadn’t really thought about until I’m just saying that, but yes, I do feel as though they’re on my team of caring (R9)*  *And a complete lifesaver for me for overseeing the care of a 90 year old guy who has dementia and Alzheimer’s, and who really wants to live in his own home… If we hadn’t had those meals, that would have been a very particular factor as to whether he could have remained in his own home or not. So they’ve been huge. So my experience it’s been absolutely brilliant, and I really don’t have any complaints whatsoever. And, as I say, the office team have always been very supportive. So they’re very, very strongly part of his care package (R3)*  *I’m not a natural carer. I stepped in… So, I do the caring thing. It’s quite isolating. So, I do feel that those people are quite valuable to me, and they’re so nice to me, yes (R9)*  *We couldn’t cope without Meals on Wheels. It’s an essential service, as far as we’re concerned (R11)*  *… to me, I think there should be some help, especially if somebody’s got a primary care need, who is unable to make, cook and feed himself… CHC are involved, and they’re the ones who predominantly pay for the majority of the care, because he’s got a primary care need, but Meals on Wheels is apparently not a primary care need. Eating is not an essential part of the care. They see it as the carers should be making the meals, and when I said, “Well, you need to up the times and allow them an extra 20 minutes at lunchtime, an extra 20 minutes at tea,” the care providers can’t accommodate because they’re so stretched. He has carers 7 times a day throughout the day and working nights, and we can’t get the call times extended in order for them to make and cook his dinners. So, there’s no other choice (R6)*  *I think there should be some help, especially if somebody’s got a primary care need, who is unable to make, cook and feed himself. There should be something in place for them to be allowed a hot meal. Something needs to be available for those that have got a primary healthcare need that are unable, physically and mentally, to make and prepare themselves a warm meal, because there’s people going without any food (R6)*  *So, I’m aware of what is out there and what can be done, because some people haven’t got families. So, they’re actually being left all day, every day, just because they are either OAPs and drawing a pension, or they’ve got, like I said, a primary healthcare need and they’ve got no family to help actually organise it, because CHC and PHB and CCG, they’re unable to help with anything towards any costs of meals. It’s not good when it’s an everyday occurrence, that you’ve got to eat. I think it has a contributing effect to negative health, and if you’re not eating properly, then, obviously, they’re going to get more ill. They’re going to cost the NHS more money and it’s got a knock-on effect. (Diet is key) but they don’t see that, or they do know that, but on paper and in terms of their policies and procedures, there’s nothing there. There’s nothing there at all for people with a primary healthcare need, who need to eat, who physically can’t eat and can’t prepare and can’t actually feed themselves, but there’s nothing there to help them (R6)*  *Generally speaking, it’ll be harder for me during the day to go and see her. So, it’s nice to know that she has somebody coming in with a hot meal that I don’t have to necessarily worry about in terms of, “Oh, she will have no hot food,” and I know it’s the fact that you're looking forward to what’s coming. She’s getting, for example, desserts that normally she wouldn’t get. So, that might be a nice little treat for her. So, just the peace of mind, I guess, for me, to have that as extra help, so yes (R12)*  *So, obviously, it’s cheaper if you cook from fresh, and I do enjoy it. I love doing it. So, it’s not a problem. So, it’s, sort of, 50/50, you know, three times of the week, she gets hot meals from Meals on Wheels, and then the other times, it’s either the carers will do maybe, like, a sandwich or I’ll be there and I’ll prepare enough food for three days or thereabouts. So, it’s a, kind of, joint effort, so yes (R12)*  *So, there is that to think about, then I, kind of, work full-time and then there is Mum. So, my plate really is quite full to say the least. So, I think they’ve been brilliant and, again, for that peace of mind, I mean I know it’s just a little thing. You know, just a little thing, a hot meal and hopefully somebody coming in, as I said, saying hello. At least, hopefully, checking that she’s okay. That actually is, kind of, priceless really because it’s one more thing that I don’t have to worry about (R12)*  *It’s incredibly stressful, yeah, trying to care for someone when they’re not living with you all the time. But that’s just me, I worry. (Laughter) I want her to be happy, I want her to be healthy and the problem was she wasn’t before (R13)* |
| **Promoting independence and enhancing social interactions** | **- Reliability and consistency of service delivery**  *But going back a bit, there was a time when like on bank holidays, I’ve never had the Meals on Wheels on, they had a few bank holidays or over Christmas. And I did say to them I said, “What happens on those days? Do you still bring the meals?” And they said, “Oh, yeah, yeah, you won’t miss out on the meals, they won’t just leave you with nothing.” They said even Christmas and everything else they still have to bring them (SU6)*  *Well, they come more or less at a regular time, so I know exactly when to look out for them (SU8)*  *It depends on who’s delivering. We have two people who deliver on this round and they each live at a different end of the round. So, one starts at one end and we get it late, and the other starts at this end and we get it early, 12 o’clock-ish. Of course, I know it can’t be helped, but the days when [anon] brings it at 12 o’clock, they’re piping hot but later on, it’s usually between half past twelve and a quarter to one, coming the other way. They’re still hot, don’t get me wrong. Don’t get me wrong, they’re not cold, but it’s not the same ‘hot’ if you know what I mean (SU4)*  *I mean, the driver said to me when I was learning how the service works, “We sometimes have to get people off the floor. That’s sometimes why we’re late.” I mean, they come at the end of the timeslot rather than the beginning of the timeslot because what they’re also doing is checking on the welfare of the person they’re delivering the meal to (SU3)*  *They come every day, except Christmas Day, and they bring lovely, hot ready-made meals and you have quite a choice… They have a very good staff- a driver, and they’ve never failed me so far (SU3)*  *I mean, the thing about care is its continuity, isn’t it, and they’ve never failed me in that way. They bring me my hot food every day… If there are any gaps in it, you start to feel lonely, isolated, unsupported, and this had no gaps in it. I wouldn’t change that. I mean, even if you ring up on a Sunday or a Bank Holiday, they’re there. There’s no gaps in it, and I wouldn’t change that (SU3)*  *…because my mum knows what time they're coming. And although she has Alzheimer’s, she is a creature of routine. So you put her out of her routine and she can’t remember anything. But the routine of the day is set in concrete. So she knows what time they're coming, she’s ready with her oven gloves (R10)*  *Well they specify between 12:30 and 1:00 for our area. It’s usually around 1 o’clock… they do give a small window and they’re very reliable (R13)*  *So because she had dementia, one of the things that it was tailored was they would try and keep the same people coming in to have a little bit of consistency. So we have the same three people that come (R4)*  *…we didn’t originally start with seven days, but because it’s the routine for Dad, that’s why I swapped to seven…you see, and Dad waits now. When it gets to 11:55, he’s looking out of the window. So, I know and he knows what’s happening (R9)*  *… I think it had snowed and they came, and I said to her, “Oh, I didn’t know if you would come,” and she said to me, “We always aim to get here,” and that was really reassuring to hear, and they were. You know, even though snow, they still come and to know that that’s their policy, that was reassuring (R9)*  *… but it's not at exactly the same time. So I would say the earliest it typically arrives is maybe half-past-11, quarter-to-12, and the latest is probably about half-past-1. That doesn’t worry him. He is quite happy with that as long as he's getting it at what he considers to be lunchtime (R1)*  *Well, I’ve been around there and they’ve come about 12:00. I thought they started later before. It doesn’t matter, she has no idea what day of the week is or the time, so she’s just pleased to get it. It’s quite early, yes, about 12:00. And it’s piping hot (R2)*  *They arrived usually around midday and at weekends it might be slightly later but they’re always there, by say, 1:00 which is perfect, yes (R17)*  *Yes, because we try and be there at the weekend, to make sure he eats some of it. They usually come any time from 1:00 to 1:30, is normal. If they're after 1:30 or just before, that’s unusual. It’s usually between 1:00 and 1:30 (R20)*  *… consistency is very important to someone with Alzheimer’s. The fact that A, she likes them, B, they consistently arrived on time, it’s a steadfast rock-solid thing and she really looks forward to it. She knows they’re coming. She really anticipates it. That is a major factor in how successful it is… it’s generally the same driver. Occasionally a different one. Again, that’s part of the consistency, it’s important (R13)*  *The meals, well, to be honest, my mum really looks forward to the meals… Mum, she looks forward to it, it’s part of her routine of the day as well now. So, like she said, “I look forward to the meals. I'm looking forward to what I’m having for dinner today.” So, it’s just like breaks up the day for her as well, really…She gets to 12 o’clock, she’s got a talking watch and she listens to her talking watch and then, “Oh dinner will be here soon.” (R17)*  *So he sees them drive up the road and then he usually says, “Oh, here’s the Meals on Wheels” or “Here’s lunch” or whatever he says on the day. And then he gets up because he’s not very mobile. So he slowly gets up and then he’s able to answer the door…The problem for him is, he eats and he likes eating but he doesn’t remember he needs to eat. So when a meal arrives it prompts him that that’s an activity he then needs to do (R3)*  *Huge piece of mind. I know it’s going to be reliable. I know she’s getting fed whether I’m with her or not. I know she’s enjoying the meals and I know she’s benefiting from them. I know she’s happy (R13)*  *Mum and myself and the family have been very pleased because they have been so reliable. It’s just nice to know that Mum is having a hot meal every day (R17)*  *The meals, well, to be honest, my mum really looks forward to the meals… Mum, she looks forward to it, it’s part of her routine of the day as well now. So, like she said, “I look forward to the meals. I'm looking forward to what I’m having for dinner today.” So, it’s just like breaks up the day for her as well, really…She gets to 12 o’clock, she’s got a talking watch and she listens to her talking watch and then, “Oh dinner will be here soon.” (R17)*  *What I value is that we see the same two or three people, and that makes a difference. I think if it was different people all the time, that would lessen my experience because, as I say, I feel as though I know them. So, I value having that…The consistency of people, yes, I think that makes a huge difference (R9)*  *The fact that they bring her the meal, at the same time, every day, and it’s the same familiar people (R10)*  *What I have noticed though is that there seems to be continuity. As I say, I’m not there all the time, but when I have been there, it has always been the same chap that has delivered it. So I think that’s quite useful as well, because it’s like having the same carer every day, which he doesn’t, but this person is the same person all the time. And I think that’s quite reassuring for him (R11)*  *She needs regular meals. I will cook dinner for her here, 10 minutes later she’ll say, “When are we having food?” (Laughter) But yet she knows the Meals on Wheels come every day at 1 o’clock. It’s like my parrot. (Laughter) She knows when she’s going to be fed. The consistency is vital. That throws up all sorts of problems once consistency slides (R13)*  *Overall, I think it’s an excellent service. Like I said, I don’t have any worries about anything. I know the food comes regularly and my dad’s looking out of the window for the van to arrive (R14)*  *I think the timing is good, that it’s mostly consistent. It’s a reliable time for him. I think, if it was delivered at odd times, it would make it harder for him to know that it was time to eat (R20)*  *About 1:00, so that’s perfect. And that’s consistent, that seems to be consistent. They must have their round and that’s consistently- Give or take 15 minutes. That’s fine, he’s not fretting where his meal is at all (R22)*  *The timing as well, they're really good with their timing… I understand they go to so many different places. How they can always still get here on time, it always amazes me because I've only got to be in two places, and I'm always late for the second, so...(Laughter) Yeah, the way they are spot on with their timing. Those are definitely the two things I think I wouldn't change, so the drivers, the timing (R4)*  *What I wouldn’t change is the seven day a week thing. I think it’s great to know that if they needed it, they could have breakfast and- they could have two meals a day if they wanted. I wouldn’t change the fact that it’s available for them seven days a week. That’s a must, I think (R5)*  *And there’s not been a day when they haven’t turned up and it’s been so reliable, it’s been a really good service (R17)*  *Well, I think I may have in the beginning. They said, “Oh we will be delivering around about 11:30” and I thought, “Well, that’s not her lunch” and they said, “Well we have to because we’ve got so many people to deliver to” and I thought, “Okay. There’s no point me complaining because I kind of understand that you’ve got X amount of people to deliver to and so few resources.” So it is what it is… So generally, by the time lunch comes at 11:30 she’s not in the mood for lunch, so it ends up sitting on the side. This is why we’d reduced it to three times a week because she was throwing them away which was silly (R5)*  *It is later than I would have really hoped for, but I think it varies between 1:00 and 2:00. He never really tells me. I never really enquire, but he is not fussed, and they have to be later, don’t they? (R7)*  *Yes, it’s quite good for her, they come about 12:45, between 12:45 and 1:15… We tried it for my mother-in-law as well, but they came at 11:30 and it was too early (R10)*  *Now, it may just be that he’s at the beginning of the journey, if you like, but sometimes they're there about 11:15, 11:30, which is quite early, when he perhaps hasn’t had his breakfast until the carers come in, at 9:00. And then, if he leaves it too long, it's cold before he eats it. So the delivery is possibly one area where it could be improved, but I completely understand they're constrained to the number of vans they can afford to run, and all of those sorts of things. So we have to be as flexible as we can (R11)*  *That’s the only thing that sometimes I’m a bit uncertain of, because they say between… so, they’re about from 11:30 onwards. So, that’s normally any time between 11:30 and 2:00, but sometimes it’s been 2:30. So, there have been times that maybe I have been there at Mum’s sometimes, you know, the extra time I do go and see her at lunchtime, and we’re still waiting and I’m thinking, “Gosh, this meal’s a bit late.” So, I suppose they might get stuck in traffic. So, it’s generally around lunchtime. The bracket is quite a big bracket (R12)*  *They do come quite early. It’s taken him a bit of time to get used to the timings because they generally come usually between 11:45 and 12:30 usually at the latest. So they are very early (R15)*  *I think they turn up at 11:30, which as I say is a bit early for her. But obviously in a service like this you can’t have everybody eat at… because you can’t do it, so you do fit in a bit with what they can do (R21)*  *About 1:00, so that’s perfect. And that’s consistent, that seems to be consistent. They must have their round and that’s consistently- Give or take 15 minutes. That’s fine, he’s not fretting where his meal is at all (R18)*  **- Importance of interactions in reducing isolation and loneliness**  *They’re very friendly, the delivery people. “You’ve got so and so today.” “Oh, alright.” “Enjoy it,” and off they go. We do have a little chat from them (SU8)*  *… very good company for a person who lives on their own. This is a virtue! (SU6)*  *It's nice when somebody brings a hot meal to your front door and that means there's always somebody every day, Saturday and Sunday, who I speak to… It's nice when somebody knocks at the door or rings the bell and you know it's dinner time, it gives a point to the day, especially when it's a hot meal (SU2)*  *… he has got to know the guy that comes in to deliver it. Now, he doesn’t hang around, but he always says hi and makes contact with him. When he’s living on his own, he’s got the carers going in twice a day, but apart from that, he’s quite isolated. Now that is his choice, he doesn’t want to go into a care home. As I say, I live quite a long way away, I go up as often as I can, but I can’t be there 24/7. So it’s just another point of contact, someone with a friendly face, that he recognises, and can say hi to (R11)*  *… one of the main benefits is its interaction with another person. It’s only five minutes, but the problem is when you’ve got somebody that’s housebound she doesn’t see people. All her friends have died off. Now her husband’s dead, my father’s, passed away… So I think that it’s good that there’s the interaction with somebody else… (R21)*  *You know, it’s just a nice familiar face, and he has a lot of banter with them as well, because he’s still got all his speech and capacity…It promotes his overall wellbeing by just seeing that familiar face (R6)*  *You know, if I had to go away, it’s the peace of mind for him, it’s keeping him healthy, he’s doing fine, and the fact they come, they’re pleasant, it’s human contact… (R9)*  *‘And the fact he actually sees another human being going in even briefly just for a couple of minutes. Because you can get quite lonely when you’re on your own.’ (R3)*  *They value the meal, obviously, but they also value that pop-in call from a familiar face. Like I said, we’ve got two particular gentlemen that deliver the meals. They’ve both got a really good rapport with my dad. My dad’s got their mobile numbers, and they have been for a random cup of tea during the week when they’re not working, and they have built up a friendship. For him, that pop-in call… (R6)*  *I suppose he sees another person. He is quite a solitary person, my brother. He doesn’t socialise much. But when he gets to know somebody he will be quite reasonably chatty with them. Yes, he has that. Certainly during COVID, even if it was only for 10 minutes when they took the meal in, he did see another living soul which was great…They do seem to genuinely care about the people that they are delivering the meals to, that is the impression that I get (R7)*  *Also, I think it’s the fact that she has somebody coming in. Albeit quickly, she has somebody coming in and saying, “Oh, hello,” and they provide a meal. It’s almost like a break in the day… They always seem to be polite, they always seem to say, “Oh, enjoy your meal.” So, they seem to be friendly enough, which is good (R12)*  *Erm, not really. I honestly can't fault them. (Laughter)… The one thing that would be really good, and I've said this to everybody I've spoken to, is I think the Meals on Wheels coming to the home are invaluable, but it would be really nice if they had a day centre where once a week...for that social interaction. I know that's probably not possible… but I think that would be absolutely amazing if there was some sort of day centre where they still get that Meals on Wheels and the meal provision, but there was more social interaction as well (R4)*  **- Promoting independence and ‘ageing in place’**  *They bring me my milk. That’s really important to me… Because I can’t get out. They bring me my fresh milk twice a week, and they would bring me my bread (SU3)*  *… a complete lifesaver for me for overseeing the care of a 90 year old guy who has dementia and Alzheimer’s, and who really wants to live in his own home…If we hadn’t had those meals, that would have been a very particular factor as to whether he could have remained in his own home or not. So they’ve been huge. If I look back, they’ve been part of what’s allowed him to remain in his own home, and I know the NHS were trying to encourage people to remain at home (R3)*  *So I know from that that he’s very, very appreciative. And I know he would be really appreciative because it allows him to be at home, but it also means he does get meals and I know he really enjoys them (R3)*  *Yes. If I didn’t know that he was getting a hot meal every day, there’s no question in my mind, he would have to go into residential care. Which would not be good for him, from his point of view, because he doesn’t want to do that. But it also wouldn’t be good from Social Services point of view because that’s additional cost (R11)*  *… I live 100 miles away, so I couldn’t possibly give him the support that he needs. Without that, he would have to go into residential care (R11)*  *And also, from my point of view, it means that there is somebody going in during the day, so that if anything did happen in between the carer visits, that would be picked up, and they could- Because he’s got one of these lifeline things, they could press the buzzer and get help. So no, I think he is very fortunate to have that kind of support, to enable him to stay in his own flat (R10)*  *I think you’ve probably picked up from what I’ve said that I have got no complaints at all. I really think they are doing a sterling service and keeping people in their own homes (R11)* |
| **Service operation and interactions with service users** | **- Efficiency and flexibility of customer service**  *… if you’ve got any problems, you can send them an email or telephone them and they’re very quick to rectify things (SU3)*  *I think I’m quite satisfied with the service and the meals themselves… I’m very happy with it… they’re all very nice (SU1)*  *I shall carry on with it, if that’s good enough. (Laughter). They’re really friendly and you get the feeling they really care. You know, if something is wrong they do something about it, kind of thing (SU4)*  *There's a telephone number that they sent me initially and I keep it… It was written on a nice, big, bright yellow card with the details of the service and the telephone number. So, it was really clear cut, as to the rules that they work by (SU2)*  *Sometimes, if my nephew comes up, he will take me out for a meal, so I'll ring the day before, as requested, and say, you know, "Cancel the meal for such and such a day." That just automatically happens. So, they're quite efficient with their telephone service, as long as you ring them the day before (SU2)*  *You always feel there's somebody on the end of the phone who can sort out your problem, which is useful (SU2)*  *They were short of drivers the other day so they did say to me, “Oh, your meals they’ll definitely come today but they’re going to be late”, which I didn’t mind because that’s not their fault, it's just something that happens (SU6)*  *… I must say they are incredibly responsive… They work on a Sunday and if you want to cancel a meal, you have to give them 24 hours notice, but they’re on the ball…They’re incredibly on the ball, these people… The management is very accessible. You can talk to them (SU3)*  *They don’t come in, but they would come in if I needed them to… I know they’d probably help me put the meal on the table, but I don’t have that, but I think that they would do it if you have disabilities that meant that you couldn’t open the meals yourself (SU3)*  *Oh yes, they’ll take the lids off for me. Yes, I’ve got no problem there. They take the lid off, they go, “There’s your dinner. Enjoy it.” “Cheers. See you tomorrow,” and off they go. I haven’t got any problem with the delivery people (SU8)*  *Yes, they come in. If you can’t manage to put the meal onto a plate, they do it, apparently. I can cope with that, so I don’t need that. But I gather that they do things like that (SU4)*  *Excellent. [Anon] is the guy I almost always talk to. He's the manager. He generally answers the phone and he's always very friendly, very amenable, very helpful, very positive… When [anon] was a bit doubtful about the quality, when it dipped a bit, I asked [anon] if he’d send me the menu as well. So every week I get an email from [anon] saying, “Hello, [anon], I hope this finds you well, here's next week's menu.” So I'm able to have a look at it and just satisfy myself that it's okay (R1)*  *Yeah, I find it very good. They’re very efficient, they’re always polite, they’re always available. If I need to change anything, stop anything, ask a question, they’re always there. So yeah, I’m quite happy with it (R5)*  *Generally, the Meals on Wheels provide menu sheets and again this is another big plus for me. They’re very, very easy to deal with in the office. I’m on first name terms with [anon] in the office. I can just ring or email her and I’ll get an instant reply. But I just order that way via email (R13)*  *I called them when we were trying to sort out her meal options of what she did and didn’t like. Yes, the girls in the office who pick up the phone were always really helpful, really friendly. Yes, can’t fault them at all (R8)*  *I always feel listened to. You know, I wouldn’t swap them. I’m really pleased with them (R9)*  *I wouldn’t change the people that run that company at all. They do everything they can. Like I said, you can tell they really care and it’s not just all about profit for them, which is amazing to see these days (R6)*  *… when I initially contacted Meals on Wheels they said that if she needed it they would set the table for her and get a glass of water. They even offer to take the lid off for you, don’t they? (R8)*  *If something comes and she really doesn’t like it, she’ll tell the person delivering it and they will apparently make a note of it on their system to try and stop her receiving that one again as well (R8)*  *You know what I’m saying? If they didn’t like something, they’d say, “Oh no, that’s not very- I didn’t like that” or whatever. I generally say, “Well let’s look at getting something else if you don’t want to have this, this or this.”…But it just needs me to speak to the people in the office and say, “Can we change this up for something else on this day?” I think generally it’s okay (R5)*  *So she’s getting that, every meal, every day… she wobbles – to get it into her eating room, living room. So I just suggested to them, could they bring it in? Which they were more than happy to do, just help her plate it up and take it to the room where she eats it. So, excellent (R2)*  *... So if somebody puts something in front of him, he’d eat it. And I noticed, because I was up seeing him last week, when it was delivered, and they have now started to put it actually in front of him, on his little table. They used to put it in the kitchen, but his level of disability is such- So yes, they just put it in front of him, and he’ll eat it (R11)*  *About his provision. There are some weekends when he is due to come to us on Sunday, we've had to have a change of plans to have him over on the Saturday, as long as I phone up by the day before, they’ll swap those two days over. They’ve been really good and very flexible, and been really helpful to me (R7)*  *…when I have been there, normally, what they would do is they remove the lid. Essentially, it’s like a takeaway tray for the hot food. They remove the cardboard, sort of, rectangular lid, shall we say, and then they would put it on a plate for her, and that’s the hot food, but there was that particular one time with the salad that they hadn’t, and Mum, bless her, she just was really struggling to figure out what to do (R12)*  *Yes, because at least we know that, every day, he has the opportunity, if he’s hungry, to have something hot…And something with vegetables. That we haven't got to- I mean, we’re all working, so we haven't got to be there. We know he’s got something and, if he’s hungry, he will eat it. He’ll always eat his pudding. So it’s just knowing that he has got the option of eating a hot meal… They will dish it up for him, when we’re not there, because otherwise he won’t eat it. Which is good (R20)*  *She has a hot main course and a hot pudding. They come, they deliver them. They plate them up for her because she's not very mobile and she's got dementia. So they come in… so they'll plate them up in the kitchen, and then they will take them, and they'll put them on her table in front of her and bring her cutlery in, and then, yes, she'll eat them… (R4)*  *And also, because my dad is a very fussy eater and Meals on Wheels were brilliant, they just altered the menu for my dad, which was lovely as well, so, which was really good… there’s only certain foods that he’d eat… which they catered for Dad, so he was okay (R17)*  *… it was flexible enough that if I go up to visit [the service user], which I try to do as often as I can, you can cancel a given day's meal as late as 10:00 that morning. So that's tremendously flexible (R1)*  *Very straightforward, very helpful. And I get a statement of account every month, it’s just emailed through directly to me. I’ve no problems with that at all (R11)*  *Yeah, they’re very lovely, very helpful. I’ve never had any issues. Yeah, they’re always- no, I find them very helpful (R15)*  *…I ring the office and I say to the girl, you know, “The dinner that she’s had she’s not liked very much, can we make sure she don’t have it again?” She’ll just go through the menus with me and it’s fine, absolutely fine. I’ve got on very well with the girl at the office, she’s been very helpful really (R16)*  *Lovely, really friendly. I just suggest something and then they get it done straight away. If I need to cancel a meal, I always give them 24 hours’ notice, if not longer, and they’re brilliant (R17)*  *They're very good. I just email them if we need to cancel for any reason, i.e., he’s got an appointment somewhere, or… That’s usually the reason I interact with them, is that we want to cancel it for an odd day or something, or Christmas, or things like that. But they're always very quick to respond (R20)*  *Yes, very good. The people who man the phones are very nice, they're always really pleasant on the phone. Yes, no problems at all (R22)*  *But to be honest, when I get through to them, they seem to be really quick with their- if I need to change something or add something, it’s done straight away. They get into the screen, and they seem to be able to do it straight away. So any interaction I’ve had with them has been very quick, very efficient (R5)*  *I’m a bit of a stickler because I like Dad to have what I’ve ordered, and if they’ll bring something that isn’t quite right, I take it. I make a phone call and I have to tell you, the customer service has been brilliant. Whenever I’ve had to ring and say, “We ordered this, and actually, we wanted something else,” and she says, “Oh, we won’t charge you for that.” They’ve just been brilliant and they just put it right…Always get an apology. Always, he says, “You don’t have to pay. We’ll put that right.” So, you're never left feeling that you’ve complained. I always feel listened to. You know, I wouldn’t swap them. I’m really pleased with them (R9)*  *They're always brilliant and lovely, really helpful. Like at Christmas, obviously mum should have been coming here for Christmas dinner. I think it was two days before Christmas, I came down with COVID… And I phoned them up and I said, “I’m really sorry, it’s really late to let you know this, but she’s going to be on her own and she’s got no Christmas dinner.” They were brilliant, they said, “No worries, we’ll get it sorted, we’ll get it on the rota.” (R10)*  *Really good, I have to say. The lady I speak to.. she’s pretty much been the contact I’ve had since I started off… she’s very responsive, she’s helpful, and yes, she’s really prompt and professional. So, yes, I haven’t had any problems with that (R12)*  *I had to contact Meals on Wheels and just ask could they keep a closer eye. I had to contact social services as well. But Meals on Wheels, [anon] in the office, brilliant. They did just that, checked on her (R13)*  *…I’ve gone and found that some things have been left and no I don’t like that, so I’ve rang the lady up and I’ve said, you know, this. So, we’ve gone through the menus, and we’ve just changed it for something else on that day next time it comes around (R16)*  *I email them, and they get back to me so quickly, I’m so impressed with them (R17)*  *I couldn't fault them. I think they're a wonderful service, I really do (R4)*  *No, no. I think we’ve struck really lucky. As I say, I wouldn’t look to change them and I wouldn’t want them to change what they’re doing for us. For me and Dad, it couldn’t work better (R9)*  **- Friendliness of drivers who deliver the meals**  *The staff have… nice friendly natures which cheers you up (SU5)*  *They're all quite friendly (SU2)*  *… they always ask how I am and they always say goodbye and everything else. They’re always nice and polite (SU6)*  *They are nice and polite, they say, “Hello, how are you?” and all this sort of thing and then they say goodbye and then they leave (SU6)*  *My mail comes about 11 o’clock-ish in the morning and I don’t know what it’s for because I can’t read anymore. So I slit the envelopes and (the driver) tells me what it is, in case it’s something that needs dealing with immediately. She does help me that way (SU1)*  *All the drivers I’ve seen have been very friendly and approachable… (R3)*  *They've almost befriended [the service provider]… he's moved house since he's been receiving the meals. And when he moved in, the two deliverers, not the company, the two deliverers themselves, bought him a gift, a housewarming gift... (R1)*  *We’ve built a rapport with the people who come. We tend to see the same two or possibly three people. We’re on first name terms with them… (R9)*  *But I think there is quite a good relationship going on between her and the man who delivers them, he’s very jovial and she likes to have a laugh with him. His sense of humour suits [anon], which probably is another condition to it being a success for us (R16)*  *… he had a very regular driver, he was a lovely chap… they used to have a little two-minute chat, about the football or something like that. (R21)*  *I mean, I’ve never seen them physically check for any hazards. If my dad’s said, “Oh, I’ve dropped that on the floor,” they’ve picked it up, no problem, and there’s one particular gentleman who will say, “Are you alright? Do you need anything while I’m here?” but yes, I think they’d definitely report it or, you know, if my dad said, “I can smell something. Can you smell that?” they’d go and have a look for him. They’re very nice men* *(R6)*  *Some of them put the cartons in the bin, some of them just leave them out on the side and then they go (R14)*  *She answers the door, she takes it off them. She doesn’t want the social interaction, she just wants the meal. She tends to have three different drivers. There are two men and a lady, and they're all really pleasant and she always says how lovely they all are. But she particularly likes the lady, because I think ladies are just a little bit more- The female driver calls her by her first name, so she will say, “Hello [anon], how are you today? Here’s your lunch.” And mum quite likes that (R10)*  *So the reactiveness of the drivers and the friendliness of the drivers, that definitely I wouldn't want to change (R4)*  *I’ve got a pretty good relationship with them where we are all on first name terms because I speak to them that much. I think that’s how it should be because they know they can approach me if they’re going to be late and I can relay that information and things like that (R6)*  *I wouldn’t change the staff that’s there as well, as in the drivers, not at all. They’re amazing gentlemen who would give up anything to go and help somebody. Like I said, they’ve even been for a cup of tea with my dad off-shift and it just shows that they care (R6)*  *… but they’re so friendly… I would go as far as to say I’m delighted with them. Couldn’t ask for more friendlier people. The meal is fine. Dad is thriving on them. He is happy with it, and as I say, he was very reluctant to move into that sort of situation. So, yes, I’m very pleased (R9)*  **- Length of interactions with MoWs drivers**  *They don’t really have a lot of time because they’ve got- I don’t know how many deliveries they have to do but they run around, sort of thing. They’ve only got a limited two or three minutes to spend with people (SU1)*  *They don’t stay and chat or anything like that because obviously they’re busy and they’ve got to deliver other people’s food as well. But they come in, drop it off. They are nice and polite, they say, “Hello, how are you?” and all this sort of thing and then they say goodbye and then they leave (SU6)*  *So, they understand but they don't have any time for talking. Very little conversation, they just say, "It's such and such today for dinner," they tell me what the meal is and they check how I'm feeling, "How are you feeling?" "I'm alright," and, "Is there anything you're feeling a bit uneasy about with the food or anything?"… (SU2)*  *They don’t stay very long because they’re under huge pressure to get round all the clients, customers (SU3)*  *Oh, not much more than two or three minutes. Really, just putting the meals (SU4)*  *Well, I’m at the end of the line so if anything does crop up, we do have a little chat at times. But, I mean, anybody who’s in the middle of the line, they probably can’t do it with them. They’d be longer on the round and the dinners would definitely be cold (SU4)*  *Not 10 and not five, between. About eight minutes. Yes, by the time they come up the stairs, put it on the table and down the stairs. It doesn’t take 10 minutes (SU8)*  *Oh, no, they haven't got time. No, they're straight in, they always ask, "How are you feeling? How are you?" Usually, I'll just say, "Oh, I'm good, I'm alright, thank you." They put the food down or they put my sandwiches in the refrigerator or, if it's a Friday, they put the milk in the slot in the door of the fridge. Everything has its place and they know where everything goes (SU2)*  *They don’t stay and chat or anything like that because obviously they’re busy and they’ve got to deliver other people’s food as well. But they come in, drop it off. They are nice and polite, they say, “Hello, how are you?” and all this sort of thing and then they say goodbye and then they leave…Only really about two seconds, just drop it off and then they go (SU5)*  *Oh, it’s literally it’s just dropping off the meal. It’s literally, they just come up the stairs, say hello to Mum, “How are you today?” They put the meal on the tray, and they tell her what it is, because obviously Mum can’t see it, and they explain what’s the meal today and then off they go. But they’re always friendly, everyone’s really lovely… To be honest, Mum is so used to having her dinner straight away she probably wouldn’t want to chat that long anyway because she’d want to get on with her dinner (R17)*  *Oh, not very long, I don't think. I think, if we wanted to, we could ask them, I believe. If we paid a little bit more money, they would stay 5 or 10 minutes. But to be honest, I don't think they’d get any interaction out of him anyway, so we haven't gone down that route. When we’re there, they literally just bring it in and then they’ll go. They’ll say hello to him, and then they’ll go (R19)*  *Quite brisk, because they're on a roll, but really friendly… I get the sense, from my tiny, tiny snapshot… I get the impression they’ve got a lot of houses to go to (R2)*  *It’s not very long. I’m not there obviously every day and it might be that [anon] might be more chatty one day than another. Because sometimes he is more elusive, and he is a bit chatty and other times he’s quite quiet. And the other thing is of course when I’m there, which I probably only see them once a month or something if it might coincide when I’m there at the same time, they might not have a tendency to stay very long because they can see I’m there and that he’s got somebody there (R3)*  *How long are they- oh I would say less than a minute… it is a very quick transaction in that respect where they’re in and out. But I don’t get the impression that they wouldn’t stop and talk if they were asked a question, but I think they’ve just never been asked a question (R5)*  *You know, they do have a couple of minutes. There’s one gentleman who stayed about five minutes and one about three minutes, and then they’ll make sure they say bye before they go, “I’m back on shift tomorrow,” or, “I’m not on now until Friday. So, you’ve got so-and-so,” and yes, then they go, but when anybody else is there as well, they’ll say hello to them and introduce themselves (R6)*  *For my mum, she just answers the door and, on the doorstep, he hands it over to her and she takes it off into the kitchen. It literally is a 10-second interaction. If you wanted, they would go in and they would take it into the kitchen and they would plate it up for you, if you wanted them to. But at the moment, my mum likes to do that herself (R10)*  *But they knew him by name and they are careful, and very, very pleasant couple of, three minutes, interaction. Though I think they scooted off because I was there (R7)*  *No, not that. Five would probably be pushing it I would say, but yes (R8)*  *It’s quite brief, because I have been there when it is delivered. He’s got a key safe thing, so they can have access, they don’t need to ring the doorbell. They come in, they always say, “Hi, so-and-so, how are you today? Here’s your lunch.” If it’s the right day, they’ll give him his menu list for the following week, and they pick that up the following day. It’s pleasant but it’s brief. They don’t hang around because they’ve got- I don't know how many other clients they’ve got to go and visit in a relatively short space of time (R11)*  *Three or four minutes. It’s literally he comes in, “Hi,” puts the food down, “See you tomorrow.” (R11)*  *I would say absolute maximum ten, but not even that. So, on average, I would say five minutes. Yes, a quick in and out, so yes (R12)*  *10 minutes, if that, yeah. But they are busy people, you’ve got to understand that. (Laughter) (R13)*  *I would say they’re here all of three minutes… it’s just quickly got out the car, because they come in foil containers. So, they’re quickly opened, dished on the plate, put on the table. Some of them put the cartons in the bin, some of them just leave them out on the side and then they go (R14)*  *Well I think now not for very long. I think literally dad takes it almost off them outside really because they come and knock on the door, I think. But previously when he couldn’t manage walking about so much, they would come in and put it on his tray in his kitchen and then they could take it. Sometimes they would take it into him if he was in the living room (R15)*  *Now the person who delivers it, she’s a lady, she comes- I think she’s still wearing rubber gloves, but it’s just on a clipboard. And she never comes in. She does sort of shout, “Alright to plate up?” or something, but she’s virtually in the car (R21)*  *I think there could be more social interaction. But the service, I do understand the pressures they're under. And I don't know how big their round is. But whether or not, looking ahead, they could- Well, it’s as per usual, whether they could get- Maybe it could be like it used to be, a few more volunteers, just maybe a smaller round, with a little bit more social interaction for some people maybe (R21)*  *And things like in this hot weather, it would be quite good to know that- I mean, my dad was alright, because we had- I was ringing him to prompt him to do drinks, and I Facetimed him, and he’s got this, it’s excellent, it’s like a huge TV screen, so I could Facetime. So I’m on an app and I can ring him, and I can look and see how much he has drunk. So if he’s saying, “I’ve been drinking,” I can say, “Well dad, you’ve still got about half your lemon barley, you need to keep drinking.” But things like they could just go and say, “Can I get you a cup of tea?” which they never have time to do, or, “Would you like a drink of water with your meal?” Or something like that, just to- Because they never drink enough (R21)*  *I think you can pay for a more enhanced packet where they will stay for 15 minutes or so, and either sit and have a chat or do things… But certainly, I've got peace of mind that if they suspected something was wrong they would be in touch with me (R7)*  *At the moment, I know that the service, you can ask for an extra 15 minutes for the person to stay. At the moment, we’re not doing that. It might be something that I look further down the line in terms of more companionship because that is good (R12)*  *Initially, when I signed up to the service, we paid extra for someone to stay with my mum for 15 minutes, but it just seemed that they weren’t used to doing that and other than talking to us, there was nothing extra done and, at that time, Mum seemed to be eating the meals okay (R14)* |
| **Implications of external factors on the MoWs service** | **- Reliability during pandemic restrictions**  *… since COVID they’ve never missed one single meal, never, haven’t missed at all (SU1)*  *Did I feel the change during COVID? I didn't really notice any difference. I mean, I'd started so many years before and everything just carried on (SU2)*  *Well, they were under huge pressure, but they never failed me, not one day did they, no, even under all the pressure they were all under. They had to wear masks, and they’ve only just stopped, I mean, with my consent, stopped wearing masks, but no, they wore masks. I was amazed at the resilience and the capability of these very, very practical people (SU3)*  *We’ve been really, really pleased with them. They were a real blessing in lockdown, when we weren’t able to go over to my dad and my stepmother. It was a big relief, and I’m very grateful that they're able to do it (R20)*  *Certainly during COVID, even if it was only for 10 minutes when they took the meal in, he did see another living soul which was great… They do seem to genuinely care about the people that they are delivering the meals to… (R7)*  *They didn't stop delivering, which was reassuring. They took extra precautions. For the period of the lockdowns, he was still in his bungalow. And instead of coming in and putting the meal on the kitchen surface for him and having a chat, they asked him to meet them at the door. So both he and they wore a mask and they kind of handed it over at arm's length. But since then, they've been coming into the flat and putting it on the surface for him or in the fridge or whatever’s appropriate (R1)*  *Not to my knowledge…what I found was that they were very informative in that you would know if something had to change. And I know at times their services and same with the carers they were stretched and there were some limitations. But he didn’t suffer from the consequences of any of that, and I never got the sense that he went completely without (R3)*  *There would have been a massive impact if say they said we can’t do it for a few months, which would be understandable. That would have been difficult (R3)*  *(in the case of a new lockdown) I don't think there would be that much difference to be honest. So no, I don't think there would be that much difference (R4)*  *I think if hypothetically we were in another situation where they had to stay in and they couldn’t really go out because they don’t anyway. I think they would look at community meals as oh at least we have our dinners delivered… That would be one less thing to worry about. It wouldn’t cause a worry. It would alleviate a potential worry (R5)*  *They may be impacted in regards to the timings of the meals being delivered because, you know, they might have staff going off. So, they might have to put two routes onto one, which might mean that my dad’s meal doesn’t come actually when the carers come and, therefore, it’s pretty pointless (R6)*  *Because he wasn’t going to the day centre I had to up his meals. No, I've got no worries at all (R7)*  *I mean, during the pandemic, before we got the diagnosis, Dad was absolutely distraught about has he got enough food, where we were going to get it from. What we’ve got now, albeit at this cost, you know, is peace of mind… We were still in restrictions, but yes, because he lived on his own and he was worried about food, and we were worried about… well, everybody was, but what we’ve got in place now, if there were to be another lockdown, we know we’ve got reliability. We know Dad is going to have a warm good dinner. So, it’s peace of mind. You know, you can’t put a price on that, I suppose, yes (R9)*  *If there was another lockdown, I would feel so relieved that we have got this in place for Dad. You know, if need be, we could put the sandwiches in place. I don’t think we would need that, but we’ve got a peace of mind (R9)*  *It continued really well throughout COVID. The only difference was that they wore a mask and my mum did as well… Bu it still came on time, the food was still there. And that was reassuring. And it kept her routine exactly the same (R10)*  *No, I think it’s been the same really. It hasn’t changed at all, no. Like I said, they’ve been really good. So reliable, throughout COVID, every single day someone turned up. So, there wasn’t a day where they didn’t have any meals and they’ve always been reliable (R17)*  *If it stopped, that would be a major issue. If they were no longer able to deliver, for whatever reason, that would have a major impact. And as I say, the upshot would be he would have to go into residential care, which would not be easy under lockdown conditions either, because a lot of the care homes were not able to take in new residents (R11)*  *That’s a tricky one, to be fair. I mean, I know that numbers are rising again. So, touch wood, fingers crossed, it’s not going to go that way again, but I think probably from my experience, I would say that they might limit contact. Obviously, I would like to think they will continue service because it’s a really important service, but they probably would limit the contact. I don’t know what they did during COVID. I don’t know how it was arranged, but they might just perhaps leave the meal somewhere, perhaps without actually having contact with the person. I don’t know, but I think they would probably try to somehow limit the contact, which would affect the service, obviously, well part of it, even if it’s just a very small part of it, but part of it is the interaction. Even if it’s just for a quick, “Hello, enjoy your meal,” that’s just still a nice thing to break the day (R12)*  *I don’t really feel she would, no. Because at the tail-end of the COVID issue I was looking after her here and the meals were coming here, and they were still spot-on, reliable, he wore a mask, he minimised contact. It was easier because he knew I was there as well, of course, so he didn’t have to spend as much time as he would. But no, it ran very smoothly, just the same. He just came in with a mask, did what he had to do, polite, efficient, cheerio and off he went (R13)*  *Well, I don’t think so because, as I say, they started during COVID times and the drivers come with their masks on. So, I don’t think that would be an issue as such. Whether supplies would be affected, I don’t know, if we had another outbreak of COVID with the Ukraine situation. I don’t know (R14)*  *Erm, no, probably not, because we’re lucky really. I live very close to my dad so he’s only five minutes up the road, he’s not very far. At the end of the day, I do lots of things for him anyway, but this just obviously takes a little bit of the pressure off me in one way. So no, if something happens and say Meals on Wheels was no more, then we would manage around that (R15)*  *So therefore, would it be impacted? Well, I would hope it wouldn’t be because I think they would manage it as I’ve just said, but I wouldn’t be surprised if it was impacted because it becomes very difficult, everything becomes difficult during lockdown, doesn’t it (R18)*  *Well I would obviously if they said they couldn’t provide them. I would then have to hope that we could get something- If the carer- I mean, to be honest, as I say, he’s not eating very well at the moment anyway, so even if he was just to have something on toast. I’d hope that the carers might be able to get something for him, if we got the food in (R19)*  *I don’t know, I don’t think so. I mean other than masks and obviously the usual kind of thing. What they did do over winter, there again which she was very impressed with, they delivered about four or five meals free which they stuck in the freezer. And it was like, “If there’s snow we can’t get to you you’ve got meals there.” (R20)*  *…Certainly in the pandemic, they were handing the meals, which are very, very hot, on a clipboard. They're wearing rubber gloves and PPE. Handing it through, just on a clipboard, without taking it through. I think the idea is my dad would have a trolley, they’d put it on the trolley and then my dad would deal with it, they weren’t coming in the house. And I think for an older person, who maybe isn't as able, that could be a problem (R21)*  **- Impact of the cost-of-living crisis**  *Well, it’s very good, and they are constantly trying to improve it, but because of all the things that are happening in our society at the moment, they said they can’t provide beef or salmon sandwiches any longer because it’s just too expensive (SU3)*  *Yes, I mean I obviously don’t have to cook or shop for that matter. Obviously, recently the price of everything has gone up a bit, I think it is still value of money. I don’t have any washing up (SU1)* |
|  | *The thing is, it did work out cheaper because before I got Meals on Wheels I was getting a lot of takeaways because obviously with my disability problems I couldn’t cook or anything like that. And it was working out cheaper than actually buying takeaways every single day (SU6)*  *They could be a bit cheaper saying that, it is quite expensive every month. Nearly £300 a month for small portions. That could be a little bit better but at the end of the day, if you want that type of service (SU6)*  *I mean, I don’t know how they manage to keep the price as it is, and the quality. It’s gone up a little bit (the price), but not astronomically. Oh, I mean I don’t know anybody else who could provide a tasty, hot meal for that price (SU3)*  *So, you know, if you cooked the same meal at home and bought your stuff at Tesco or a local market, you’d produce it for less than £7.50, but it's being prepared, heated, delivered, etc. They're giving him the once over once a day. So it strikes me as reasonable value for money when you take all of that into consideration (R1)*  *I think not shy off of £7 now. I think the quality of the food and someone coming in and checking every day, I think it’s very good value for money I’d just say, yes, overall, it is a very worthwhile service and very good value for money, I think, personally (R8)*  *I mean, we’re not so hard up that it’s going to represent a problem for us. Now, whether it does to some people – I’m not stupid – it could be a lot of money. We’re paying 42 a month, I suppose. But we think it’s money well-spent. But I can imagine that’s a lot of money for some people (R2)*  *I think they’ve gone up recently, haven’t they, and I think the same as a lot of older people they’re very aware of when they get the bill. They’re, “Oh, I’m paying this much a day for my food” and I’m saying, “Yeah, but it’s a hot meal delivered to you.” “Yeah, I know.” So they’re very aware it’s gone up. I think it's £6 something a day, isn’t it? (R5)*  *For £6/£7 a day you could probably cook yourself something different and maybe a bit better or whatever. But it’s the fact that it’s cooked, it’s made, it’s hot and it’s delivered. They don’t have to do any of the thinking. I think so for the dinner and pudding for one meal. Yeah, to be honest with you- and that’s delivered as well. So it is really, it is value for money. I don’t think- if it was any less probably the meals couldn’t be like they are, they’d have to cut back on something (R5)*  *… safeguarding and the care and the other things that attach to it. And the fact he actually sees another human being going in even briefly just for a couple of minutes. Because you can get quite lonely when you’re on your own… So all of that makes it value for money because it’s not really just a meal (R3)*  *And it would be for others, I think, because it's a lot of money to pay for a care service to come in and do a half an hour welfare check, compared to getting a hot meal and a welfare check (Laughter) for half the price. So for me, the benefit of that, it just outweighs everything (R4)*  *On balance, I’d say for what they provide, because it’s not just the food, you know, you have to bear that in mind, yes, for the service and also the person comes in. So, it’s a bit of extra company. Even though they don’t stay, it’s like seeing one more person coming in. So, overall, I think it’s good value for money (R12)*  *…if the company weren’t making as much money and they had to up the prices again, it wouldn’t impact him, but it would impact me again… because when I got the price increase letter, I think it was only about 50p a meal, but 50p a meal every day for six days a week, over four weeks, you know, it adds up. So, for me, it’s expensive. I suppose if my dad was drawing a pension, and he’s only 57, so he can’t draw a pension of anything, but it also would be expensive, £200-a-month out of just a pension (R6)*  *So, it recently went up. I think it’s about £8 now for a meal and a dessert. I think it’s around that price tag. For me personally, it’s expensive because I pay for it. My dad doesn’t pay for it, and the only reason why he doesn’t pay for it is because he doesn’t want to and he says, you know, he’s fine and he’ll make do, but obviously, he’s my dad and I need him to have a hot meal. I have a hot meal every day. I wouldn’t want to see him without. So, for me, it’s a cost that I’m not actually gaining anything from personally, and there’s no help or support towards family members who are doing it for relatives (R6)*  *They’ve just gone up from £8.15 a time to £8.65, and I can totally understand why they’ve had to increase their prices. It is just, to me, they are good value knowing that he is eating them. Also, they do go into his flat. If he were on the floor or anything like that (R7)*  *So, it recently went up. I think it’s about £8 now for a meal and a dessert. I think it’s around that price tag. For me personally, it’s expensive because I pay for it. My dad doesn’t pay for it, and the only reason why he doesn’t pay for it is because he doesn’t want to and he says, you know, he’s fine and he’ll make do, but obviously, he’s my dad and I need him to have a hot meal. I have a hot meal every day. I wouldn’t want to see him without. So, for me, it’s a cost that I’m not actually gaining anything from personally, and there’s no help or support towards family members who are doing it for relatives. (R5)*  *Yes, well, obviously, the price has just gone up. Dad can afford it, and it’s peace of mind and it’s a good routine. You know, I’d hate to know what it would be like for people who were struggling. We’re not in that position. So, for us, it’s worth every penny (R9)*  *I’m really pleased with it. She’s paying about £62 a week, and that’s for a main and a pudding, seven days. To me, it’s a lifeline really, because otherwise I would have no life, because I would be there all the time (R10)*  *I think it’s good value for money, to be honest. I can’t remember how much it works out a day, I could check, if you want me to, but it’s about- I don't know, it works out about £198 every four weeks. Now, that’s for two courses, that’s a hot main course and sometimes a hot pudding or cheesecake or whatever. And that’s seven days a week. I don't think it’s bad value for money, I really don’t (R11)*  *Well it would be cheaper to prepare them at home. But when you factor in the fact that you’ve not had to go and buy the ingredients, you’ve not had to spend time cooking, it’s delivered safely everyday whether I’m with her or not, then I think it’s very good value (R13)*  *Yes, I think so. If you went to, say, the local pub or anything like that, I think you’d be paying more for the meal. I mean, the cost of the main meals are £8.15. So, you’re getting two courses for that, and it’s being delivered hot to your door. So, with the fuel and with your electricity bills, and also, you don’t have to go shopping for food… So, I know my parents are being well-catered for (R14)*  *Yes, I think so, really. I think so. When you think as well that it’s cooked, it’s prepared, it’s delivered by someone that makes sure- it’s also like a bit of a check because they make sure they’re okay and they can- obviously, dad is relatively independent now, but obviously for someone who needs it put on a plate and cut up, they’ll do all those things. They’ll also give a little welfare check to make sure that things seem okay. I would say for that sort of money that’s pretty good value really (R15)*  *Well, I think so, this day and age I think it’s good value. They have like a main course and a pudding. No, I think it’s good value, especially having it delivered and everything, yes, yes (R17)*  *Well, it’s okay. Yes, it’s good, it’s fine. I can't remember how much it costs now, how much were they? I remember going through what the prices were, but they didn’t seem unreasonable, they seemed fine, yes… my mother hasn’t said, “My God, that’s expensive, I’m not going to buy that,” or, “It’s so expensive that really I didn’t want to buy it.” I don’t think it’s actually worked out any more expensive than the Farm Foods, has it, I don’t think? (R19)*  *To be honest, I can’t remember how much they are. It was a means to an end, really. It was a relief for us…So to be honest, I don't know, that wasn’t my concern. But it didn’t seem overly expensive (R20)*  *Oh, it’s fantastic, it’s really good… I mean they are a charity. The must be subsidised, they must be, I can’t see how they cannot be…I think it’s important that these people- I don’t know about other services, I mean Meals on Wheels is a bit of a buzzword that can extend to many things. But this is a service where she’s paying very little for. I don’t know for certain but if they’re not volunteers they’re not being paid much more than they’re expecting. And certainly at the price of petrol, I think they put the prices up by like a penny a visit (R21)*  *I think the cost is fine. It’s very reasonable (R21)*  *Yeah, more veg, perhaps the fish a bit more fish and perhaps a bit more meat in the casseroles and things. But otherwise, that’s impossible what with the cost of everything these days I don’t think they’ll be doing that anyway (R17)* |
